# Supplementary material for: Structural predictions of three medium-sized thiolate-protected gold nanoclusters Au44(SR)30, Au56(SR)32, and Au60(SR)34
Source: Royal Society of Chemistry journal article supplement (doi:10.1039/d3na00372h), 2023-01-01
Supplement: d3na00372h1.pdf [file d3na00372h1.pdf]

Supplimentary Materials for  
Structural Predictions of Three Medium-Sized Thiolate-Protected Gold  
Nanoclusters  $\text{Au}_{44}(\text{SR})_{30}$ ,  $\text{Au}_{56}(\text{SR})_{32}$ , and  $\text{Au}_{60}(\text{SR})_{34}$

Wenhua Han,<sup>#</sup> Gang Wang,<sup>#</sup> Pengye Liu,<sup>b</sup> Wenliang Li,<sup>a\*</sup> Wen Wu Xu<sup>b\*</sup>

<sup>a</sup>College of Energy Engineering, Xinjiang Institute of Engineering, Urumqi 830023, China

<sup>b</sup>Department of Physics, School of Physical Science and Technology, Ningbo University, Ningbo 315211, China

AUTHOR INFORMATION

<sup>#</sup>W. Han and G. Wang contributed equally to this work.

**Corresponding Author**

\*W. Li([wenliangli@vip.126.com](mailto:wenliangli@vip.126.com)), W. W. Xu ([xuwenwu@nbu.edu.cn](mailto:xuwenwu@nbu.edu.cn))

The cartesian coordinates of Au<sub>44</sub>(SR)<sub>30</sub>:

|    |          |          |          |
|----|----------|----------|----------|
| Au | 1.53252  | 0.2782   | -0.29929 |
| Au | 1.27408  | 2.00846  | 2.17824  |
| Au | -1.51624 | 1.88118  | 2.12872  |
| Au | -0.13686 | 2.6597   | -0.52718 |
| Au | 0.00773  | 0.79716  | -2.62324 |
| Au | -0.1255  | 1.14038  | 4.46016  |
| Au | 3.11235  | -0.36057 | 1.99965  |
| Au | -0.23825 | 4.61543  | 1.50056  |
| Au | 4.40465  | 0.26782  | -0.41483 |
| Au | -1.629   | 4.99776  | -0.93558 |
| Au | 1.16168  | 5.12433  | -0.90623 |
| Au | 7.00819  | -2.37685 | -0.06981 |
| Au | 4.55676  | 6.13157  | -0.50267 |
| Au | -5.09032 | 5.68863  | -0.66878 |
| Au | 6.47561  | 3.21374  | -0.40974 |
| Au | 1.61593  | 3.98213  | -3.67335 |
| Au | 1.69942  | -1.1908  | 5.09183  |
| Au | -1.79564 | 3.80336  | -3.73661 |
| Au | -0.24248 | 4.11683  | 5.15009  |
| S  | -7.00056 | 4.75544  | 0.3823   |
| S  | 6.53203  | 5.37211  | 0.5731   |
| S  | -3.20305 | 6.75176  | -1.61747 |
| S  | -0.14418 | 5.24355  | -4.66121 |
| S  | 7.22716  | -3.0913  | -2.31556 |
| S  | -0.17899 | 2.27044  | 6.65856  |
| S  | 6.92949  | -1.60269 | 2.1675   |
| S  | 2.59742  | 7.03408  | -1.47121 |
| S  | 3.56055  | 0.11906  | 4.37972  |
| S  | -3.52079 | 2.35757  | -3.01106 |
| S  | -0.28979 | 5.88431  | 3.58226  |
| S  | 3.43452  | 2.68015  | -2.90479 |
| S  | -3.02754 | -1.48861 | -4.13056 |
| S  | 6.48872  | 1.07303  | -1.40943 |
| Au | -0.00888 | -0.56938 | 2.25612  |
| Au | -1.5669  | 0.12511  | -0.3629  |
| Au | 0.11534  | -2.36387 | -0.04676 |
| Au | -3.13979 | -0.67843 | 1.89924  |
| Au | 3.22636  | -2.21504 | -0.08339 |
| Au | 1.51289  | -2.97614 | 2.34222  |
| Au | -1.24293 | -2.01055 | -2.53939 |
| Au | -4.4437  | -0.19908 | -0.55077 |
| Au | -2.98943 | -2.52191 | -0.18551 |
| Au | -1.28212 | -3.10783 | 2.29696  |
| Au | 1.54525  | -1.87841 | -2.49783 |
| Au | 0.27481  | -4.35234 | -1.93585 |

|    |          |          |          |
|----|----------|----------|----------|
| Au | 5.03417  | -2.92091 | 2.743    |
| Au | -1.45286 | -5.75791 | 0.25825  |
| Au | -4.72413 | -3.38709 | 2.80654  |
| Au | -6.75183 | 2.61111  | -0.59872 |
| Au | 1.99495  | -5.58553 | 0.36372  |
| Au | -6.68733 | -2.84681 | 0.03117  |
| Au | 0.16833  | -4.89527 | -5.06474 |
| Au | -1.80931 | -1.28433 | 5.03753  |
| S  | -2.81933 | -4.58336 | 3.54653  |
| S  | 0.29361  | -6.82571 | 1.46732  |
| S  | -6.62283 | 0.42663  | -1.48615 |
| S  | -0.11332 | -3.41574 | -6.88767 |
| S  | -6.84463 | -3.53759 | -2.22752 |
| S  | 3.25842  | -4.30876 | 3.48714  |
| S  | -0.03512 | -2.52253 | 6.04661  |
| S  | -3.36054 | -4.88304 | -0.82684 |
| S  | -6.7151  | -2.18804 | 2.30265  |
| S  | -3.70182 | -0.08877 | 4.23422  |
| S  | 0.44288  | -6.42593 | -3.26587 |
| S  | 3.84847  | -4.53688 | -0.66278 |
| Au | 0.01325  | -1.28792 | -5.83318 |
| S  | 0.14174  | 0.95674  | -5.0863  |
| Au | 3.26016  | 3.04622  | -0.52225 |
| Au | -3.51438 | 2.6941   | -0.6191  |
| S  | -3.65505 | 3.01566  | 1.75974  |
| S  | 3.22154  | 3.4569   | 1.85097  |
| S  | 3.28838  | -1.12043 | -4.03636 |
| Au | 5.21649  | -2.08106 | -3.08354 |
| Au | -4.89457 | -2.43491 | -3.03326 |
| H  | 4.50889  | -0.85562 | 4.53403  |
| H  | -0.01519 | -3.51447 | 5.1065   |
| H  | -4.60597 | -1.09678 | 4.43002  |
| H  | -2.83901 | -5.5843  | 2.61206  |
| H  | -7.59802 | -3.13387 | 2.74088  |
| H  | -6.24635 | -4.75348 | -2.04967 |
| H  | -3.22222 | -0.19053 | -3.74325 |
| H  | -2.81077 | -4.78554 | -2.07314 |
| H  | 0.36138  | -7.94048 | 0.68067  |
| H  | 4.70962  | -4.68957 | 0.38915  |
| H  | 3.11608  | -3.70617 | 4.70787  |
| H  | 7.88674  | -2.43818 | 2.66935  |
| H  | 6.6917   | -4.33583 | -2.1361  |
| H  | 3.05936  | -2.09457 | -4.96558 |
| H  | 7.32416  | 0.45153  | -0.52393 |
| H  | 7.43383  | 5.93382  | -0.28481 |
| H  | 2.86464  | 6.63663  | -2.7508  |

|   |          |          |          |
|---|----------|----------|----------|
| H | 4.16388  | 2.52498  | 2.18178  |
| H | 4.41434  | 3.61097  | -3.10508 |
| H | -0.21606 | 6.19457  | -3.68214 |
| H | -4.58021 | 3.18088  | -3.26603 |
| H | -3.15874 | 4.28914  | 1.77543  |
| H | 1.05009  | 6.14559  | 3.5996   |
| H | -1.5303  | 2.16033  | 6.81932  |
| H | 1.80789  | -6.44176 | -3.28654 |
| H | -1.47686 | -3.47521 | -6.92814 |
| H | 1.50437  | 1.04456  | -5.11104 |
| H | -6.1448  | 0.76788  | -2.71922 |
| H | -7.93422 | 5.24896  | -0.48332 |
| H | -3.38351 | 6.27616  | -2.88586 |

The cartesian coordinates of Au<sub>56</sub>(SR)<sub>32</sub>:

|    |           |           |           |
|----|-----------|-----------|-----------|
| Au | -0.612111 | 1.470052  | -2.306151 |
| Au | -0.734034 | -1.464702 | -2.270985 |
| Au | -1.806893 | 0.066811  | 0.059807  |
| Au | 0.719352  | -1.505921 | 0.387917  |
| Au | -3.224775 | -2.856047 | -2.535382 |
| Au | 0.666775  | -0.090187 | -4.347204 |
| Au | 3.436545  | -0.121012 | 0.550840  |
| Au | -3.047473 | 3.069059  | -2.549308 |
| Au | -0.957318 | -4.400383 | -2.197566 |
| Au | -1.904615 | -2.928590 | -0.008482 |
| Au | -1.570437 | 6.580737  | -0.051410 |
| Au | -1.688938 | 3.039496  | -0.064954 |
| Au | 1.907077  | -0.071329 | -1.932074 |
| Au | 2.471269  | 1.348356  | 2.886460  |
| Au | 2.388753  | -1.475392 | 2.890963  |
| Au | 3.165065  | -3.159183 | 0.519705  |
| Au | 0.828266  | 1.458936  | 0.365877  |
| Au | 1.756161  | -3.114412 | -1.893688 |
| Au | -0.643630 | 4.391461  | -2.286064 |
| Au | 3.379694  | 2.936811  | 0.490835  |
| Au | 0.712976  | -4.479937 | 0.319641  |
| Au | -4.680614 | 4.932246  | -0.329595 |
| Au | 1.019363  | 4.411312  | 0.254969  |
| Au | -5.057606 | -4.574190 | -0.197052 |
| Au | 1.986716  | 2.977154  | -1.940906 |
| Au | -0.341314 | 0.035873  | 2.641725  |
| Au | -1.752175 | -0.046423 | -6.026079 |
| Au | 6.463384  | 1.544226  | 0.988737  |
| Au | 6.323655  | -1.969999 | 1.028003  |
| S  | 0.464954  | -0.299923 | -6.850262 |
| S  | 0.472540  | 6.640135  | 1.161139  |
| S  | -3.578425 | 6.800749  | -1.315875 |
| S  | -3.823129 | 0.342169  | -5.000643 |
| S  | -0.253403 | -6.400089 | -3.459301 |
| S  | 5.143938  | -3.873026 | 1.816957  |
| S  | 5.387260  | 3.484582  | 1.845089  |
| S  | 7.730554  | -0.273751 | 0.116972  |
| S  | -6.013399 | 3.162519  | 0.537121  |
| S  | -6.212072 | -2.671727 | 0.636435  |
| S  | 1.698557  | 3.507005  | 3.801395  |
| S  | 2.481097  | -0.272047 | 7.082473  |
| S  | 1.458742  | -3.551579 | 3.851006  |
| Au | 4.861834  | -0.131459 | 2.943111  |
| Au | 4.557900  | -0.103486 | 5.973619  |
| S  | 6.593613  | -0.045486 | 4.735246  |

|    |           |           |           |
|----|-----------|-----------|-----------|
| S  | -0.085968 | -6.583273 | 1.312601  |
| Au | -2.093579 | -6.439133 | 0.042564  |
| S  | 0.064606  | 6.402224  | -3.516249 |
| S  | -4.152945 | -6.561662 | -1.155590 |
| H  | 0.584822  | -7.395524 | 0.439729  |
| H  | -3.717353 | -5.954291 | -2.300093 |
| H  | -5.696863 | -2.711385 | 1.903222  |
| H  | -1.021263 | -7.294250 | -2.768407 |
| H  | 4.736733  | -3.357394 | 3.015770  |
| H  | 8.674454  | -0.306299 | 1.103611  |
| H  | 5.921190  | 4.354927  | 0.933022  |
| H  | 6.702560  | 1.314989  | 4.700062  |
| H  | 2.392940  | 1.024889  | 7.497455  |
| H  | -4.367191 | -0.896368 | -5.165759 |
| H  | 0.481950  | -1.665051 | -6.821567 |
| H  | -5.534206 | 3.212653  | 1.817491  |
| H  | -4.155832 | 7.756465  | -0.528756 |
| H  | -0.016172 | 6.197940  | 2.358696  |
| H  | 1.248798  | 3.022648  | 4.997308  |
| H  | 1.066240  | -3.013448 | 5.044274  |
| H  | 0.600084  | 5.698025  | -4.559152 |
| Au | -4.419008 | -1.232094 | -0.299986 |
| Au | -3.351742 | 0.103950  | -2.542268 |
| Au | -4.336133 | 1.551077  | -0.315544 |
| S  | -5.007500 | 3.572163  | -3.947134 |
| S  | -5.300583 | -3.491426 | -3.708669 |
| Au | -6.299587 | 1.883452  | -2.895565 |
| Au | -6.423085 | -1.584404 | -2.843461 |
| S  | -7.715196 | 0.210862  | -1.976924 |
| H  | -5.423178 | 4.628167  | -3.185179 |
| H  | -8.656886 | 0.225506  | -2.966245 |
| H  | -4.973756 | -3.007526 | -4.944056 |
| Au | 4.329423  | -1.549151 | -1.767463 |
| Au | 4.436588  | 1.230660  | -1.766123 |
| Au | 1.671920  | -6.608457 | -2.085329 |
| Au | 4.698245  | -5.024484 | -1.648835 |
| Au | 2.032838  | 6.483704  | -2.193637 |
| Au | 4.952012  | 4.716567  | -1.715571 |
| Au | 3.424467  | -1.859747 | -4.840947 |
| Au | 3.563756  | 1.489307  | -4.879615 |
| S  | 5.934063  | -3.234079 | -2.584115 |
| S  | 3.623860  | -6.959703 | -0.777893 |
| S  | 6.089788  | 2.843291  | -2.630510 |
| S  | 4.021087  | 6.756614  | -0.913144 |
| S  | 2.236696  | 3.374046  | -4.389068 |
| S  | 5.035327  | -0.257260 | -5.537935 |

|    |           |           |           |
|----|-----------|-----------|-----------|
| S  | 1.908029  | -3.593333 | -4.337488 |
| Au | -2.875430 | 1.814099  | 2.282491  |
| Au | -2.732852 | 4.621707  | 1.954649  |
| Au | -0.401502 | 3.143387  | 2.551167  |
| Au | -3.054328 | -4.372807 | 2.056753  |
| Au | -2.990612 | -1.559710 | 2.301996  |
| Au | -0.612168 | -3.058795 | 2.606047  |
| S  | -4.448313 | 0.188043  | 3.295934  |
| Au | -1.493771 | -1.310814 | 4.878758  |
| Au | -1.334396 | 1.507265  | 4.862491  |
| Au | 1.013186  | -0.038996 | 5.140510  |
| S  | -2.259661 | 3.060254  | 6.511063  |
| S  | -2.645528 | -2.686721 | 6.540503  |
| S  | -3.734807 | 6.357846  | 3.437835  |
| S  | -4.131425 | -6.048943 | 3.543778  |
| Au | -3.451565 | -4.362718 | 5.084184  |
| Au | -3.051163 | 4.703988  | 5.010491  |
| H  | -5.343905 | 0.218102  | 2.264331  |
| H  | -5.406390 | -5.596340 | 3.362733  |
| H  | -3.783737 | -1.932654 | 6.554450  |
| H  | -5.020986 | 5.921793  | 3.303045  |
| H  | -3.442287 | 2.396103  | 6.662923  |
| H  | 6.981326  | 2.695362  | -1.602977 |
| H  | 3.503531  | 6.253909  | 0.247476  |
| H  | 3.272370  | 4.254450  | -4.241399 |
| H  | 4.688554  | -0.256677 | -6.859739 |
| H  | 2.833961  | -4.591084 | -4.211742 |
| H  | 6.813618  | -3.101866 | -1.543532 |
| H  | 4.214530  | -7.872194 | -1.605222 |

The cartesian coordinates of Au<sub>60</sub>(SR)<sub>34</sub>:

|    |          |          |          |
|----|----------|----------|----------|
| Au | 0.79882  | 0.10492  | 1.31055  |
| Au | 1.54814  | -1.45626 | -1.14617 |
| Au | -0.66882 | -0.11304 | -2.60589 |
| Au | -1.24392 | -1.55591 | -0.03872 |
| Au | -1.96459 | -0.01846 | 2.35145  |
| Au | 2.04178  | -0.00128 | -3.48476 |
| Au | 1.04224  | -2.93144 | 1.35007  |
| Au | 3.59043  | 0.22026  | 0.25055  |
| Au | -0.59309 | -3.13837 | -2.50071 |
| Au | -3.43151 | -0.23041 | -1.6223  |
| Au | 3.1009   | -1.10886 | 2.70025  |
| Au | 3.68251  | -2.8217  | 0.33355  |
| Au | -1.63314 | -3.12114 | 2.5027   |
| Au | 4.56092  | -1.19312 | -2.0721  |
| Au | -3.1898  | -3.27719 | -1.45882 |
| Au | -4.15711 | -1.59598 | 0.82834  |
| Au | -1.09164 | -4.51465 | -0.1114  |
| Au | 1.77339  | -4.29338 | -1.05166 |
| Au | 0.32424  | -1.55259 | 3.79707  |
| Au | 6.27567  | 0.35171  | -0.42144 |
| Au | -6.08153 | -0.35251 | -0.83145 |
| Au | -2.5097  | -1.38545 | 4.78901  |
| Au | -2.76036 | -1.65499 | -3.9478  |
| Au | 0.60263  | -4.36469 | 3.68498  |
| Au | -4.6088  | -0.09626 | 3.40808  |
| Au | 6.28252  | -1.32574 | 2.07739  |
| Au | 1.14118  | -6.45273 | 1.57627  |
| Au | -0.35119 | -6.63046 | -2.46872 |
| Au | -5.8967  | -2.21436 | -3.21135 |
| Au | 3.57693  | -4.46714 | 3.19941  |
| Au | -2.86353 | -5.03452 | -4.2584  |
| Au | -1.05818 | -4.37614 | 6.26036  |
| Au | 8.11524  | -0.05183 | -2.91742 |
| Au | -7.8235  | -0.28257 | 1.71402  |
| Au | 2.75929  | -3.27146 | -3.894   |
| S  | -4.02103 | -3.68113 | 2.15647  |
| S  | 0.89717  | 0.24139  | 5.39731  |
| S  | 1.98308  | -6.53786 | -2.06067 |
| S  | -6.41096 | -0.53879 | -4.82415 |
| S  | 3.49429  | -6.48196 | 1.92864  |
| S  | -5.49707 | -4.0759  | -1.78688 |
| S  | -2.62897 | -2.71248 | 6.84349  |
| S  | -3.17649 | -3.23998 | -5.77944 |
| S  | 6.07694  | -3.30884 | 0.77943  |
| S  | 5.05553  | -3.30325 | -3.2705  |



|    |          |          |          |
|----|----------|----------|----------|
| S  | 6.63189  | 0.51053  | 3.55283  |
| S  | -1.17914 | -6.66194 | 1.11202  |
| S  | 8.724    | 0.56815  | -0.70146 |
| S  | -2.675   | -6.94253 | -2.85659 |
| S  | -8.55673 | -0.44701 | -0.54416 |
| S  | 0.54441  | -3.3228  | -4.72218 |
| S  | 0.61595  | -5.94338 | 5.62226  |
| S  | -7.00474 | -0.0051  | 3.91228  |
| S  | 7.58272  | -0.60489 | -5.15365 |
| S  | 3.93783  | -2.54019 | 4.54144  |
| Au | 1.37653  | 1.57628  | -1.25051 |
| Au | -1.41209 | 1.43301  | -0.14372 |
| Au | 0.70663  | 3.14605  | 1.13952  |
| Au | -0.93483 | 2.90154  | -2.69925 |
| Au | 2.9583   | 1.66274  | 2.58919  |
| Au | 3.3461   | 3.27287  | 0.11309  |
| Au | -1.98008 | 3.10054  | 2.30245  |
| Au | 4.38618  | 1.57382  | -2.14082 |
| Au | -3.5417  | 2.82266  | -1.66876 |
| Au | -4.31165 | 1.21785  | 0.72868  |
| Au | -1.59864 | 4.36377  | -0.39811 |
| Au | 1.28648  | 4.41467  | -1.36176 |
| Au | 0.14789  | 1.85469  | 3.67627  |
| Au | -2.62836 | 1.43453  | 4.71371  |
| Au | -2.9099  | 1.09427  | -4.04422 |
| Au | 0.10703  | 4.66519  | 3.37997  |
| Au | 6.06954  | 2.19406  | 1.96359  |
| Au | 0.43226  | 6.64444  | 1.11189  |
| Au | -1.09183 | 6.3965   | -2.92893 |
| Au | -6.08036 | 1.31388  | -3.3627  |
| Au | 3.04787  | 5.07028  | 2.90158  |
| Au | -3.4051  | 4.40779  | -4.60607 |
| Au | -1.53474 | 4.64744  | 5.97198  |
| Au | 2.39037  | 3.30771  | -4.15463 |
| S  | -4.40579 | 3.38927  | 1.91391  |
| S  | 1.23547  | 6.59572  | -2.51337 |
| S  | 2.76266  | 6.96235  | 1.48227  |
| S  | -5.91274 | 3.31915  | -2.09692 |
| S  | -2.84419 | 2.82911  | 6.71249  |
| S  | -3.49013 | 2.47979  | -5.98777 |
| S  | 5.65656  | 4.05462  | 0.54022  |
| S  | 4.69885  | 3.51348  | -3.62214 |
| S  | -1.89336 | 6.58259  | 0.63607  |
| S  | -3.43202 | 6.41642  | -3.33912 |
| S  | 0.16348  | 3.1259   | -4.92618 |
| S  | -0.18027 | 6.41556  | 5.13464  |

|    |          |          |          |
|----|----------|----------|----------|
| S  | 3.59585  | 3.27948  | 4.36374  |
| S  | 2.94799  | 0.13682  | -5.77458 |
| Au | 5.23627  | -0.22673 | -5.2774  |
| H  | 2.674    | -1.15871 | -6.11606 |
| H  | 7.49034  | -1.9521  | -4.94673 |
| H  | 9.03515  | -0.68647 | -0.26335 |
| H  | 4.9061   | -4.13634 | -2.19694 |
| H  | 0.41952  | -4.68151 | -4.79869 |
| H  | -0.10567 | 4.46214  | -5.0244  |
| H  | 4.53203  | 4.45033  | -2.64124 |
| H  | 6.22418  | 3.50192  | -0.57434 |
| H  | 7.98561  | 0.59204  | 3.38818  |
| H  | 6.54877  | -2.7663  | -0.38454 |
| H  | 2.36148  | -6.08058 | -3.29373 |
| H  | -2.5536  | -7.87016 | -3.85219 |
| H  | -1.89074 | -3.20091 | -6.24261 |
| H  | 1.67482  | 6.10917  | -3.71475 |
| H  | -3.4061  | 7.28247  | -4.39529 |
| H  | -2.2036  | 2.565    | -6.44324 |
| H  | -7.76871 | -0.59823 | -4.68212 |
| H  | -5.98891 | -3.52967 | -0.63409 |
| H  | -6.38902 | 2.81907  | -0.91709 |
| H  | -8.63837 | -1.80888 | -0.58282 |
| H  | -7.13323 | -1.30274 | 4.31391  |
| H  | -1.64302 | -6.11645 | 2.27677  |
| H  | 3.48844  | -7.33789 | 2.9933   |
| H  | 2.76449  | -2.58606 | 5.24141  |
| H  | -0.23247 | -6.85112 | 5.05703  |
| H  | -3.74909 | -3.41786 | 6.51025  |
| H  | -4.46564 | -3.13846 | 3.32876  |
| H  | -4.81879 | 2.89995  | 3.12073  |
| H  | -0.26459 | 0.20793  | 6.11584  |
| H  | -4.06554 | 3.35589  | 6.4081   |
| H  | 0.94501  | 6.09866  | 5.83916  |
| H  | -2.30536 | 6.1184   | 1.854    |
| H  | 2.63453  | 7.89151  | 2.47553  |
| H  | 2.40483  | 3.21905  | 5.03253  |

Information on the absorption spectrum of Au<sub>44</sub>(SR)<sub>30</sub>:

# Spectra

| # | X              | Y            | DY/DX        |
|---|----------------|--------------|--------------|
|   | 200.0000000000 | 0.0000000000 | 0.0000000000 |
|   | 201.4000000000 | 0.0000000000 | 0.0000000000 |
|   | 202.8000000000 | 0.0000000000 | 0.0000000000 |
|   | 204.2000000000 | 0.0000000000 | 0.0000000000 |
|   | 205.6000000000 | 0.0000000000 | 0.0000000000 |
|   | 207.0000000000 | 0.0000000000 | 0.0000000000 |
|   | 208.4000000000 | 0.0000000000 | 0.0000000000 |
|   | 209.8000000000 | 0.0000000000 | 0.0000000000 |
|   | 211.2000000000 | 0.0000000000 | 0.0000000000 |
|   | 212.6000000000 | 0.0000000000 | 0.0000000000 |
|   | 214.0000000000 | 0.0000000000 | 0.0000000000 |
|   | 215.4000000000 | 0.0000000000 | 0.0000000000 |
|   | 216.8000000000 | 0.0000000000 | 0.0000000000 |
|   | 218.2000000000 | 0.0000000000 | 0.0000000000 |
|   | 219.6000000000 | 0.0000000000 | 0.0000000000 |
|   | 221.0000000000 | 0.0000000000 | 0.0000000000 |
|   | 222.4000000000 | 0.0000000000 | 0.0000000000 |
|   | 223.8000000000 | 0.0000000000 | 0.0000000000 |
|   | 225.2000000000 | 0.0000000000 | 0.0000000000 |
|   | 226.6000000000 | 0.0000000000 | 0.0000000000 |
|   | 228.0000000000 | 0.0000000000 | 0.0000000000 |
|   | 229.4000000000 | 0.0000000000 | 0.0000000000 |
|   | 230.8000000000 | 0.0000000000 | 0.0000000000 |
|   | 232.2000000000 | 0.0000000000 | 0.0000000000 |
|   | 233.6000000000 | 0.0000000000 | 0.0000000000 |
|   | 235.0000000000 | 0.0000000000 | 0.0000000000 |
|   | 236.4000000000 | 0.0000000000 | 0.0000000000 |
|   | 237.8000000000 | 0.0000000000 | 0.0000000000 |
|   | 239.2000000000 | 0.0000000000 | 0.0000000000 |
|   | 240.6000000000 | 0.0000000000 | 0.0000000000 |
|   | 242.0000000000 | 0.0000000000 | 0.0000000000 |
|   | 243.4000000000 | 0.0000000000 | 0.0000000000 |
|   | 244.8000000000 | 0.0000000000 | 0.0000000000 |
|   | 246.2000000000 | 0.0000000000 | 0.0000000000 |
|   | 247.6000000000 | 0.0000000000 | 0.0000000000 |
|   | 249.0000000000 | 0.0000000000 | 0.0000000000 |
|   | 250.4000000000 | 0.0000000000 | 0.0000000000 |
|   | 251.8000000000 | 0.0000000000 | 0.0000000000 |
|   | 253.2000000000 | 0.0000000000 | 0.0000000000 |
|   | 254.6000000000 | 0.0000000000 | 0.0000000000 |
|   | 256.0000000000 | 0.0000000000 | 0.0000000000 |
|   | 257.4000000000 | 0.0000000000 | 0.0000000000 |

|                |              |              |
|----------------|--------------|--------------|
| 258.8000000000 | 0.0000000000 | 0.0000000000 |
| 260.2000000000 | 0.0000000000 | 0.0000000000 |
| 261.6000000000 | 0.0000000000 | 0.0000000000 |
| 263.0000000000 | 0.0000000000 | 0.0000000000 |
| 264.4000000000 | 0.0000000000 | 0.0000000000 |
| 265.8000000000 | 0.0000000000 | 0.0000000000 |
| 267.2000000000 | 0.0000000000 | 0.0000000000 |
| 268.6000000000 | 0.0000000000 | 0.0000000000 |
| 270.0000000000 | 0.0000000000 | 0.0000000000 |
| 271.4000000000 | 0.0000000000 | 0.0000000000 |
| 272.8000000000 | 0.0000000000 | 0.0000000000 |
| 274.2000000000 | 0.0000000000 | 0.0000000000 |
| 275.6000000000 | 0.0000000000 | 0.0000000000 |
| 277.0000000000 | 0.0000000000 | 0.0000000000 |
| 278.4000000000 | 0.0000000000 | 0.0000000000 |
| 279.8000000000 | 0.0000000000 | 0.0000000000 |
| 281.2000000000 | 0.0000000000 | 0.0000000000 |
| 282.6000000000 | 0.0000000000 | 0.0000000000 |
| 284.0000000000 | 0.0000000000 | 0.0000000000 |
| 285.4000000000 | 0.0000000000 | 0.0000000000 |
| 286.8000000000 | 0.0000000000 | 0.0000000000 |
| 288.2000000000 | 0.0000000000 | 0.0000000000 |
| 289.6000000000 | 0.0000000000 | 0.0000000000 |
| 291.0000000000 | 0.0000000000 | 0.0000000000 |
| 292.4000000000 | 0.0000000000 | 0.0000000000 |
| 293.8000000000 | 0.0000000000 | 0.0000000000 |
| 295.2000000000 | 0.0000000000 | 0.0000000000 |
| 296.6000000000 | 0.0000000000 | 0.0000000000 |
| 298.0000000000 | 0.0000000000 | 0.0000000000 |
| 299.4000000000 | 0.0000000000 | 0.0000000000 |
| 300.8000000000 | 0.0000000000 | 0.0000000000 |
| 302.2000000000 | 0.0000000000 | 0.0000000000 |
| 303.6000000000 | 0.0000000000 | 0.0000000000 |
| 305.0000000000 | 0.0000000000 | 0.0000000000 |
| 306.4000000000 | 0.0000000000 | 0.0000000000 |
| 307.8000000000 | 0.0000000000 | 0.0000000000 |
| 309.2000000000 | 0.0000000000 | 0.0000000000 |
| 310.6000000000 | 0.0000000000 | 0.0000000000 |
| 312.0000000000 | 0.0000000000 | 0.0000000000 |
| 313.4000000000 | 0.0000000000 | 0.0000000000 |
| 314.8000000000 | 0.0000000000 | 0.0000000000 |
| 316.2000000000 | 0.0000000000 | 0.0000000000 |
| 317.6000000000 | 0.0000000000 | 0.0000000000 |
| 319.0000000000 | 0.0000000000 | 0.0000000000 |
| 320.4000000000 | 0.0000000000 | 0.0000000000 |
| 321.8000000000 | 0.0000000000 | 0.0000000000 |

|                |                |              |
|----------------|----------------|--------------|
| 323.2000000000 | 0.0000000000   | 0.0000000000 |
| 324.6000000000 | 0.0000000000   | 0.0000000000 |
| 326.0000000000 | 0.0000000000   | 0.0000000000 |
| 327.4000000000 | 0.0000000000   | 0.0000000000 |
| 328.8000000000 | 0.0000000000   | 0.0000000000 |
| 330.2000000000 | 0.0000000000   | 0.0000000000 |
| 331.6000000000 | 0.0000000000   | 0.0000000000 |
| 333.0000000000 | 0.0000000000   | 0.0000000000 |
| 334.4000000000 | 0.0000000000   | 0.0000000000 |
| 335.8000000000 | 0.0000000000   | 0.0000000000 |
| 337.2000000000 | 0.0000000000   | 0.0000000000 |
| 338.6000000000 | 0.0000000002   | 0.0000000000 |
| 340.0000000000 | 0.0000000007   | 0.0000000000 |
| 341.4000000000 | 0.0000000027   | 0.0000000000 |
| 342.8000000000 | 0.0000000098   | 0.0000000000 |
| 344.2000000000 | 0.0000000349   | 0.0000000000 |
| 345.6000000000 | 0.0000001191   | 0.0000000000 |
| 347.0000000000 | 0.0000003906   | 0.0000000000 |
| 348.4000000000 | 0.0000012342   | 0.0000000000 |
| 349.8000000000 | 0.0000037585   | 0.0000000000 |
| 351.2000000000 | 0.0000110401   | 0.0000000000 |
| 352.6000000000 | 0.0000313038   | 0.0000000000 |
| 354.0000000000 | 0.0000857483   | 0.0000000000 |
| 355.4000000000 | 0.0002270835   | 0.0000000000 |
| 356.8000000000 | 0.0005818327   | 0.0000000000 |
| 358.2000000000 | 0.0014433685   | 0.0000000001 |
| 359.6000000000 | 0.0034692161   | 0.0000000006 |
| 361.0000000000 | 0.0080846851   | 0.0000000034 |
| 362.4000000000 | 0.0182797171   | 0.0000000175 |
| 363.8000000000 | 0.0401274915   | 0.0000000842 |
| 365.2000000000 | 0.0855789798   | 0.0000003796 |
| 366.6000000000 | 0.1774296225   | 0.0000016123 |
| 368.0000000000 | 0.3578455932   | 0.0000064546 |
| 369.4000000000 | 0.7025022920   | 0.0000243876 |
| 370.8000000000 | 1.3432287293   | 0.0000870659 |
| 372.2000000000 | 2.5030285633   | 0.0002940433 |
| 373.6000000000 | 4.5483589369   | 0.0009404829 |
| 375.0000000000 | 8.0644075305   | 0.0028520029 |
| 376.4000000000 | 13.9595423606  | 0.0082088547 |
| 377.8000000000 | 23.6047656293  | 0.0224498743 |
| 379.2000000000 | 39.0124912988  | 0.0583984020 |
| 380.6000000000 | 63.0559271107  | 0.1446415074 |
| 382.0000000000 | 99.7255479413  | 0.3414537211 |
| 383.4000000000 | 154.4126160092 | 0.7690473024 |
| 384.8000000000 | 234.2018006516 | 1.6541917166 |
| 386.2000000000 | 348.1464540839 | 3.4013714350 |

|                |                  |                 |
|----------------|------------------|-----------------|
| 387.6000000000 | 507.4921902492   | 6.6923208164    |
| 389.0000000000 | 725.8085706759   | 12.6115609252   |
| 390.4000000000 | 1018.9864987433  | 22.7846234873   |
| 391.8000000000 | 1405.0617500590  | 39.5006898356   |
| 393.2000000000 | 1903.8338083939  | 65.7755316628   |
| 394.6000000000 | 2536.2639353783  | 105.2996672700  |
| 396.0000000000 | 3323.6563124885  | 162.2178383261  |
| 397.4000000000 | 4286.6493015884  | 240.7055972394  |
| 398.8000000000 | 5444.0677012860  | 344.3489605634  |
| 400.2000000000 | 6811.7081860081  | 475.3884942766  |
| 401.6000000000 | 8401.1457668136  | 633.9466990880  |
| 403.0000000000 | 10218.6565030074 | 817.3987351689  |
| 404.4000000000 | 12264.3492152983 | 1020.0534692380 |
| 405.8000000000 | 14531.5863124734 | 1233.2742712983 |
| 407.2000000000 | 17006.7521653094 | 1446.0897707647 |
| 408.6000000000 | 19669.3991370870 | 1646.2410138538 |
| 410.0000000000 | 22492.7697202495 | 1821.5102723370 |
| 411.4000000000 | 25444.6619591442 | 1961.1067968658 |
| 412.8000000000 | 28488.5780442362 | 2056.8666902754 |
| 414.2000000000 | 31585.0755770135 | 2104.0633487540 |
| 415.6000000000 | 34693.2294279647 | 2101.7103209239 |
| 417.0000000000 | 37772.1100139119 | 2052.3458947803 |
| 418.4000000000 | 40782.1906506828 | 1961.3894157535 |
| 419.8000000000 | 43686.6107945107 | 1836.2287386360 |
| 421.2000000000 | 46452.2411444657 | 1685.2229958804 |
| 422.6000000000 | 49050.5180671367 | 1516.7855997593 |
| 424.0000000000 | 51458.0359918428 | 1338.6616445976 |
| 425.4000000000 | 53656.9050486600 | 1157.4507931306 |
| 426.8000000000 | 55634.8956301596 | 978.3703372531  |
| 428.2000000000 | 57385.4008344198 | 805.2165238874  |
| 429.6000000000 | 58907.2517267434 | 640.4695415058  |
| 431.0000000000 | 60204.4195475814 | 485.4941818420  |
| 432.4000000000 | 61285.6344224959 | 340.8040084202  |
| 433.8000000000 | 62163.9431526959 | 206.3708673686  |
| 435.2000000000 | 62856.2207592833 | 81.9661566441   |
| 436.6000000000 | 63382.6430246015 | -32.4863164229  |
| 438.0000000000 | 63766.1214859567 | -136.5797426530 |
| 439.4000000000 | 64031.6989997549 | -229.1629935328 |
| 440.8000000000 | 64205.9034940526 | -308.2004111754 |
| 442.2000000000 | 64316.0598161360 | -370.7961377744 |
| 443.6000000000 | 64389.5642147093 | -413.4045490406 |
| 445.0000000000 | 64453.1322150743 | -432.2173257413 |
| 446.4000000000 | 64532.0374899165 | -423.6847209987 |
| 447.8000000000 | 64649.3657643245 | -385.1013991644 |
| 449.2000000000 | 64825.3128443142 | -315.1718690901 |
| 450.6000000000 | 65076.5587189844 | -214.4699423921 |

|                |                  |                 |
|----------------|------------------|-----------------|
| 452.0000000000 | 65415.7498162573 | -85.7203373741  |
| 453.4000000000 | 65851.1186686534 | 66.1447441251   |
| 454.8000000000 | 66386.2645821519 | 234.1704176138  |
| 456.2000000000 | 67020.1108251836 | 409.7900030394  |
| 457.6000000000 | 67747.0440514335 | 583.4189249788  |
| 459.0000000000 | 68557.2310010186 | 745.1680627851  |
| 460.4000000000 | 69437.0969311249 | 885.6017025640  |
| 461.8000000000 | 70369.9406302368 | 996.4635742286  |
| 463.2000000000 | 71336.6530775612 | 1071.3015189869 |
| 464.6000000000 | 72316.5014403233 | 1105.9352680966 |
| 466.0000000000 | 73287.9375349640 | 1098.7301905751 |
| 467.4000000000 | 74229.3902275911 | 1050.6601026156 |
| 468.8000000000 | 75120.0043666362 | 965.1619826566  |
| 470.2000000000 | 75940.2943462924 | 847.8028976021  |
| 471.6000000000 | 76672.6877298027 | 705.7934909298  |
| 473.0000000000 | 77301.9428342208 | 547.3925348774  |
| 474.4000000000 | 77815.4330606709 | 381.2533036165  |
| 475.8000000000 | 78203.2993338579 | 215.7651066723  |
| 477.2000000000 | 78458.4796607875 | 58.4424563883   |
| 478.6000000000 | 78576.6310312094 | -84.5898704656  |
| 480.0000000000 | 78555.9633247911 | -208.9751861279 |
| 481.4000000000 | 78397.0074046268 | -312.3368597605 |
| 482.8000000000 | 78102.3401815154 | -394.3080163871 |
| 484.2000000000 | 77676.2883040245 | -456.3792763521 |
| 485.6000000000 | 77124.6295676384 | -501.5820143460 |
| 487.0000000000 | 76454.3075311832 | -534.0409837629 |
| 488.4000000000 | 75673.1706127997 | -558.4436883204 |
| 489.8000000000 | 74789.7425445037 | -579.4826617520 |
| 491.2000000000 | 73813.0268899357 | -601.3293959412 |
| 492.6000000000 | 72752.3447023169 | -627.1944035743 |
| 494.0000000000 | 71617.2015577175 | -659.0171668211 |
| 495.4000000000 | 70417.1782815424 | -697.3138422712 |
| 496.8000000000 | 69161.8387324290 | -741.1916801660 |
| 498.2000000000 | 67860.6479649329 | -788.5197255331 |
| 499.6000000000 | 66522.8948323178 | -836.2280697529 |
| 501.0000000000 | 65157.6144306906 | -880.6948898847 |
| 502.4000000000 | 63773.5075113956 | -918.1732105426 |
| 503.8000000000 | 62378.8558772669 | -945.2083121519 |
| 505.2000000000 | 60981.4346198893 | -959.0016352721 |
| 506.6000000000 | 59588.4236687663 | -957.6867517077 |
| 508.0000000000 | 58206.3223704359 | -940.4958043314 |
| 509.4000000000 | 56840.8716060635 | -907.8088328210 |
| 510.8000000000 | 55496.9882503626 | -861.0917383188 |
| 512.2000000000 | 54178.7165809908 | -802.7397508844 |
| 513.6000000000 | 52889.2006151333 | -735.8510951844 |
| 515.0000000000 | 51630.6803600053 | -663.9596146777 |

|                |                  |                 |
|----------------|------------------|-----------------|
| 516.4000000000 | 50404.5137190335 | -590.7554738945 |
| 517.8000000000 | 49211.2244084946 | -519.8202285041 |
| 519.2000000000 | 48050.5748235746 | -454.3973625307 |
| 520.6000000000 | 46921.6614526879 | -397.2128214019 |
| 522.0000000000 | 45823.0292634888 | -350.3530967908 |
| 523.4000000000 | 44752.8005420696 | -315.2018962250 |
| 524.8000000000 | 43708.8130044441 | -292.4309984077 |
| 526.2000000000 | 42688.7616394486 | -282.0369446662 |
| 527.6000000000 | 41690.3386857740 | -283.4128882006 |
| 529.0000000000 | 40711.3663749438 | -295.4441382437 |
| 530.4000000000 | 39749.9175531938 | -316.6164538016 |
| 531.8000000000 | 38804.4199835776 | -345.1276177504 |
| 533.2000000000 | 37873.7409733278 | -378.9948743016 |
| 534.6000000000 | 36957.2499156770 | -416.1530743061 |
| 536.0000000000 | 36054.8573257194 | -454.5405335313 |
| 537.4000000000 | 35167.0299358439 | -492.1714415864 |
| 538.8000000000 | 34294.7823530820 | -527.1950295476 |
| 540.2000000000 | 33439.6466311902 | -557.9425686950 |
| 541.6000000000 | 32603.6218456297 | -582.9636639827 |
| 543.0000000000 | 31789.1063596848 | -601.0533130739 |
| 544.4000000000 | 30998.8159230857 | -611.2709468964 |
| 545.8000000000 | 30235.6910467736 | -612.9522821720 |
| 547.2000000000 | 29502.7972518059 | -605.7144211359 |
| 548.6000000000 | 28803.2218055427 | -589.4543239371 |
| 550.0000000000 | 28139.9704473859 | -564.3406157489 |
| 551.4000000000 | 27515.8673859989 | -530.7986968965 |
| 552.8000000000 | 26933.4615387845 | -489.4892895197 |
| 554.2000000000 | 26394.9416022387 | -441.2808404598 |
| 555.6000000000 | 25902.0621085507 | -387.2165519625 |
| 557.0000000000 | 25456.0821588399 | -328.4771676791 |
| 558.4000000000 | 25057.7180447910 | -266.3409432442 |
| 559.8000000000 | 24707.1104945580 | -202.1424320783 |
| 561.2000000000 | 24403.8068200127 | -137.2317889269 |
| 562.6000000000 | 24146.7578128048 | -72.9362263948  |
| 564.0000000000 | 23934.3288460713 | -10.5250626386  |
| 565.4000000000 | 23764.3242944273 | 48.8205035623   |
| 566.8000000000 | 23634.0240923213 | 104.0321249996  |
| 568.2000000000 | 23540.2310130702 | 154.1731787160  |
| 569.6000000000 | 23479.3270691378 | 198.4517978273  |
| 571.0000000000 | 23447.3373080391 | 236.2284178111  |
| 572.4000000000 | 23439.9992057508 | 267.0184537336  |
| 573.8000000000 | 23452.8358375829 | 290.4908947339  |
| 575.2000000000 | 23481.2310310650 | 306.4636763605  |
| 576.6000000000 | 23520.5047717240 | 314.8966763903  |
| 578.0000000000 | 23565.9872353523 | 315.8830905135  |
| 579.4000000000 | 23613.0899538302 | 309.6398015838  |



|                |                  |                 |
|----------------|------------------|-----------------|
| 580.8000000000 | 23657.3727799753 | 296.4971837508  |
| 582.2000000000 | 23694.6054944007 | 276.8886044107  |
| 583.6000000000 | 23720.8230882990 | 251.3397236671  |
| 585.0000000000 | 23732.3739549423 | 220.4575595807  |
| 586.4000000000 | 23725.9604243698 | 184.9191989838  |
| 587.8000000000 | 23698.6712754572 | 145.4599930982  |
| 589.2000000000 | 23648.0060530384 | 102.8610839355  |
| 590.6000000000 | 23571.8912011640 | 57.9361558491   |
| 592.0000000000 | 23468.6881936555 | 11.5173872714   |
| 593.4000000000 | 23337.1939971156 | -35.5593211191  |
| 594.8000000000 | 23176.6343372999 | -82.4696564617  |
| 596.2000000000 | 22986.6503556199 | -128.4164519924 |
| 597.6000000000 | 22767.2793374537 | -172.6451140932 |
| 599.0000000000 | 22518.9302673414 | -214.4584730612 |
| 600.4000000000 | 22242.3550179922 | -253.2305765973 |
| 601.8000000000 | 21938.6160107596 | -288.4189415896 |
| 603.2000000000 | 21609.0511957153 | -319.5748089155 |
| 604.6000000000 | 21255.2371909173 | -346.3510051943 |
| 606.0000000000 | 20878.9513945146 | -368.5071000938 |
| 607.4000000000 | 20482.1338418245 | -385.9116518347 |
| 608.8000000000 | 20066.8495245441 | -398.5414499070 |
| 610.2000000000 | 19635.2518230700 | -406.4777853534 |
| 611.6000000000 | 19189.5476278276 | -409.8998981055 |
| 613.0000000000 | 18731.9646439581 | -409.0758612298 |
| 614.4000000000 | 18264.7212880013 | -404.3512579873 |
| 615.8000000000 | 17789.9994976571 | -396.1360849579 |
| 617.2000000000 | 17309.9206884297 | -384.8903701290 |
| 618.6000000000 | 16826.5250059524 | -371.1090271451 |
| 620.0000000000 | 16341.7539418130 | -355.3064755713 |
| 621.4000000000 | 15857.4363052891 | -338.0015429535 |
| 622.8000000000 | 15375.2774748262 | -319.7031296500 |
| 624.2000000000 | 14896.8517923539 | -300.8970646947 |
| 625.6000000000 | 14423.5979113624 | -282.0345138208 |
| 627.0000000000 | 13956.8168665092 | -263.5222231150 |
| 628.4000000000 | 13497.6725985946 | -245.7147976723 |
| 629.8000000000 | 13047.1946439777 | -228.9091281550 |
| 631.2000000000 | 12606.2826816500 | -213.3409931800 |
| 632.6000000000 | 12175.7126237605 | -199.1837854718 |
| 634.0000000000 | 11756.1439357872 | -186.5492377159 |
| 635.4000000000 | 11348.1278799994 | -175.4899624385 |
| 636.8000000000 | 10952.1163895000 | -166.0035707765 |
| 638.2000000000 | 10568.4712990473 | -158.0380987510 |
| 639.6000000000 | 10197.4736820575 | -151.4984470187 |
| 641.0000000000 | 9839.3330697095  | -146.2535308102 |
| 642.4000000000 | 9494.1963569494  | -142.1438400578 |
| 643.8000000000 | 9162.1562305020  | -138.9891242721 |

|                |                 |                 |
|----------------|-----------------|-----------------|
| 645.2000000000 | 8843.2589848789 | -136.5959408753 |
| 646.6000000000 | 8537.5116230393 | -134.7648374795 |
| 648.0000000000 | 8244.8881681208 | -133.2969759249 |
| 649.4000000000 | 7965.3351408911 | -132.0000466092 |
| 650.8000000000 | 7698.7761838042 | -130.6933636832 |
| 652.2000000000 | 7445.1158363451 | -129.2120731360 |
| 653.6000000000 | 7204.2424874483 | -127.4104449660 |
| 655.0000000000 | 6976.0305489522 | -125.1642561377 |
| 656.4000000000 | 6760.3419092122 | -122.3723018025 |
| 657.8000000000 | 6557.0267381013 | -118.9570975802 |
| 659.2000000000 | 6365.9237237418 | -114.8648551853 |
| 660.6000000000 | 6186.8598275345 | -110.0648272691 |
| 662.0000000000 | 6019.6496475616 | -104.5481252449 |
| 663.4000000000 | 5864.0944814477 | -98.3261165402  |
| 664.8000000000 | 5719.9811785096 | -91.4285057951  |
| 666.2000000000 | 5587.0808677897 | -83.9011987825  |
| 667.6000000000 | 5465.1476436254 | -75.8040390970  |
| 669.0000000000 | 5353.9172840562 | -67.2084967996  |
| 670.4000000000 | 5253.1060698951 | -58.1953760622  |
| 671.8000000000 | 5162.4097639757 | -48.8525961819  |
| 673.2000000000 | 5081.5028012008 | -39.2730878198  |
| 674.6000000000 | 5010.0377308079 | -29.5528345075  |
| 676.0000000000 | 4947.6449429656 | -19.7890787980  |
| 677.4000000000 | 4893.9327026299 | -10.0787032089  |
| 678.8000000000 | 4848.4875046898 | -0.5167884996   |
| 680.2000000000 | 4810.8747559908 | 8.8046541152    |
| 681.6000000000 | 4780.6397819490 | 17.7977845074   |
| 683.0000000000 | 4757.3091482805 | 26.3798794085   |
| 684.4000000000 | 4740.3922819302 | 34.4741343440   |
| 685.8000000000 | 4729.3833696618 | 42.0103339985   |
| 687.2000000000 | 4723.7635079825 | 48.9254027644   |
| 688.6000000000 | 4723.0030741516 | 55.1638460919   |
| 690.0000000000 | 4726.5642849433 | 60.6780917472   |
| 691.4000000000 | 4733.9039075885 | 65.4287384157   |
| 692.8000000000 | 4744.4760858729 | 69.3847174370   |
| 694.2000000000 | 4757.7352436749 | 72.5233719791   |
| 695.6000000000 | 4773.1390282310 | 74.8304567535   |
| 697.0000000000 | 4790.1512560659 | 76.3000605134   |
| 698.4000000000 | 4808.2448257444 | 76.9344530914   |
| 699.8000000000 | 4826.9045633306 | 76.7438586201   |
| 701.2000000000 | 4845.6299686060 | 75.7461568149   |
| 702.6000000000 | 4863.9378326275 | 73.9665147262   |
| 704.0000000000 | 4881.3647000304 | 71.4369521377   |
| 705.4000000000 | 4897.4691525393 | 68.1958447078   |
| 706.8000000000 | 4911.8338933604 | 64.2873699710   |
| 708.2000000000 | 4924.0676154489 | 59.7609023432   |

|                |                 |                |
|----------------|-----------------|----------------|
| 709.6000000000 | 4933.8066400033 | 54.6703642556  |
| 711.0000000000 | 4940.7163148872 | 49.0735414149  |
| 712.4000000000 | 4944.4921659721 | 43.0313709088  |
| 713.8000000000 | 4944.8607975843 | 36.6072114104  |
| 715.2000000000 | 4941.5805412916 | 29.8661050613  |
| 716.6000000000 | 4934.4418551460 | 22.8740407258  |
| 718.0000000000 | 4923.2674781824 | 15.6972282004  |
| 719.4000000000 | 4907.9123474369 | 8.4013926514   |
| 720.8000000000 | 4888.2632869736 | 1.0510980518   |
| 722.2000000000 | 4864.2384803862 | -6.2908922806  |
| 723.6000000000 | 4835.7867399626 | -13.5642107496 |
| 725.0000000000 | 4802.8865871585 | -20.7114297808 |
| 726.4000000000 | 4765.5451602255 | -27.6785499862 |
| 727.8000000000 | 4723.7969657821 | -34.4154278852 |
| 729.2000000000 | 4677.7024918076 | -40.8761399596 |
| 730.6000000000 | 4627.3466999910 | -47.0192809119 |
| 732.0000000000 | 4572.8374155878 | -52.8081950666 |
| 733.4000000000 | 4514.3036329486 | -58.2111408899 |
| 734.8000000000 | 4451.8937546864 | -63.2013895801 |
| 736.2000000000 | 4385.7737820804 | -67.7572595976 |
| 737.6000000000 | 4316.1254737692 | -71.8620898312 |
| 739.0000000000 | 4243.1444891026 | -75.5041548492 |
| 740.4000000000 | 4167.0385317058 | -78.6765263336 |
| 741.8000000000 | 4088.0255078869 | -81.3768853531 |
| 743.2000000000 | 4006.3317135017 | -83.6072905827 |
| 744.6000000000 | 3922.1900618077 | -85.3739079354 |
| 746.0000000000 | 3835.8383636943 | -86.6867073190 |
| 747.4000000000 | 3747.5176704992 | -87.5591323865 |
| 748.8000000000 | 3657.4706884209 | -88.0077492032 |
| 750.2000000000 | 3565.9402723290 | -88.0518797150 |
| 751.6000000000 | 3473.1680055747 | -87.7132257793 |
| 753.0000000000 | 3379.3928712230 | -87.0154893130 |
| 754.4000000000 | 3284.8500189800 | -85.9839938285 |
| 755.8000000000 | 3189.7696309769 | -84.6453122865 |
| 757.2000000000 | 3094.3758885189 | -83.0269057849 |
| 758.6000000000 | 2998.8860409006 | -81.1567771556 |
| 760.0000000000 | 2903.5095764548 | -79.0631430484 |
| 761.4000000000 | 2808.4474951308 | -76.7741275673 |
| 762.8000000000 | 2713.8916810995 | -74.3174799886 |
| 764.2000000000 | 2620.0243731600 | -71.7203185528 |
| 765.6000000000 | 2527.0177300758 | -69.0089017858 |
| 767.0000000000 | 2435.0334873953 | -66.2084282813 |
| 768.4000000000 | 2344.2227018197 | -63.3428653766 |
| 769.8000000000 | 2254.7255787583 | -60.4348066826 |
| 771.2000000000 | 2166.6713783670 | -57.5053579931 |
| 772.6000000000 | 2080.1783950882 | -54.5740507059 |

|                |                 |                |
|----------------|-----------------|----------------|
| 774.0000000000 | 1995.3540054999 | -51.6587815424 |
| 775.4000000000 | 1912.2947791384 | -48.7757770531 |
| 776.8000000000 | 1831.0866468723 | -45.9395811520 |
| 778.2000000000 | 1751.8051213727 | -43.1630637264 |
| 779.6000000000 | 1674.5155642498 | -40.4574482245 |
| 781.0000000000 | 1599.2734944871 | -37.8323560315 |
| 782.4000000000 | 1526.1249329181 | -35.2958653925 |
| 783.8000000000 | 1455.1067776306 | -32.8545826401 |
| 785.2000000000 | 1386.2472053651 | -30.5137235166 |
| 786.6000000000 | 1319.5660941764 | -28.2772024519 |
| 788.0000000000 | 1255.0754628558 | -26.1477277567 |
| 789.4000000000 | 1192.7799228599 | -24.1269008157 |
| 790.8000000000 | 1132.6771387508 | -22.2153175110 |
| 792.2000000000 | 1074.7582934274 | -20.4126702621 |
| 793.6000000000 | 1019.0085547081 | -18.7178492444 |
| 795.0000000000 | 965.4075401062  | -17.1290415174 |
| 796.4000000000 | 913.9297769273  | -15.6438269759 |
| 797.8000000000 | 864.5451551006  | -14.2592702110 |
| 799.2000000000 | 817.2193704346  | -12.9720075395 |
| 800.6000000000 | 771.9143562597  | -11.7783286201 |
| 802.0000000000 | 728.5887016880  | -10.6742522325 |
| 803.4000000000 | 687.1980549702  | -9.6555959314  |
| 804.8000000000 | 647.6955106776  | -8.7180394202  |
| 806.2000000000 | 610.0319796642  | -7.8571816005  |
| 807.6000000000 | 574.1565409839  | -7.0685913560  |
| 809.0000000000 | 540.0167751410  | -6.3478522154  |
| 810.4000000000 | 507.5590782396  | -5.6906011098  |
| 811.8000000000 | 476.7289567761  | -5.0925615020  |
| 813.2000000000 | 447.4713029736  | -4.5495712090  |
| 814.6000000000 | 419.7306507081  | -4.0576052745  |
| 816.0000000000 | 393.4514122009  | -3.6127942722  |
| 817.4000000000 | 368.5780957742  | -3.2114384347  |
| 818.8000000000 | 345.0555050652  | -2.8500180076  |
| 820.2000000000 | 322.8289201855  | -2.5252002287  |
| 821.6000000000 | 301.8442613905  | -2.2338433203  |
| 823.0000000000 | 282.0482358853  | -1.9729978739  |
| 824.4000000000 | 263.3884684518  | -1.7399059844  |
| 825.8000000000 | 245.8136166195  | -1.5319984746  |
| 827.2000000000 | 229.2734711406  | -1.3468905228  |
| 828.6000000000 | 213.7190425506  | -1.1823759869  |
| 830.0000000000 | 199.1026346133  | -1.0364206881  |
| 831.4000000000 | 185.3779054553  | -0.9071548942  |
| 832.8000000000 | 172.4999171998  | -0.7928652167  |
| 834.2000000000 | 160.4251748996  | -0.6919861092  |
| 835.6000000000 | 149.1116555644  | -0.6030911319  |
| 837.0000000000 | 138.5188280580  | -0.5248841254  |

|                |                |               |
|----------------|----------------|---------------|
| 838.4000000000 | 128.6076646248 | -0.4561904124 |
| 839.8000000000 | 119.3406447796 | -0.3959481293 |
| 841.2000000000 | 110.6817522727 | -0.3431997702 |
| 842.6000000000 | 102.5964658102 | -0.2970840100 |
| 844.0000000000 | 95.0517441818  | -0.2568278568 |
| 845.4000000000 | 88.0160064177  | -0.2217391753 |
| 846.8000000000 | 81.4591075594  | -0.1911996045 |
| 848.2000000000 | 75.3523106029  | -0.1646578914 |
| 849.6000000000 | 69.6682551310  | -0.1416236460 |
| 851.0000000000 | 64.3809231260  | -0.1216615214 |
| 852.4000000000 | 59.4656024135  | -0.1043858146 |
| 853.8000000000 | 54.8988481610  | -0.0894554784 |
| 855.2000000000 | 50.6584428176  | -0.0765695323 |
| 856.6000000000 | 46.7233548549  | -0.0654628560 |
| 858.0000000000 | 43.0736966334  | -0.0559023475 |
| 859.4000000000 | 39.6906816944  | -0.0476834269 |
| 860.8000000000 | 36.5565817453  | -0.0406268637 |
| 862.2000000000 | 33.6546835823  | -0.0345759084 |
| 863.6000000000 | 30.9692461669  | -0.0293937059 |
| 865.0000000000 | 28.4854580499  | -0.0249609693 |
| 866.4000000000 | 26.1893953136  | -0.0211738949 |
| 867.8000000000 | 24.0679801811  | -0.0179422975 |
| 869.2000000000 | 22.1089404224  | -0.0151879470 |
| 870.6000000000 | 20.3007696675  | -0.0128430887 |
| 872.0000000000 | 18.6326887218  | -0.0108491291 |
| 873.4000000000 | 17.0946079597  | -0.0091554736 |
| 874.8000000000 | 15.6770908616  | -0.0077184976 |
| 876.2000000000 | 14.3713187436  | -0.0065006411 |
| 877.6000000000 | 13.1690567184  | -0.0054696108 |
| 879.0000000000 | 12.0626209135  | -0.0045976806 |
| 880.4000000000 | 11.0448469663  | -0.0038610780 |
| 881.8000000000 | 10.1090598017  | -0.0032394476 |
| 883.2000000000 | 9.2490446948   | -0.0027153829 |
| 884.6000000000 | 8.4590196119   | -0.0022740188 |
| 886.0000000000 | 7.7336088162   | -0.0019026763 |
| 887.4000000000 | 7.0678177219   | -0.0015905548 |
| 888.8000000000 | 6.4570089735   | -0.0013284652 |
| 890.2000000000 | 5.8968797230   | -0.0011085988 |
| 891.6000000000 | 5.3834400776   | -0.0009243281 |
| 893.0000000000 | 4.9129926826   | -0.0007700345 |
| 894.4000000000 | 4.4821134071   | -0.0006409605 |
| 895.8000000000 | 4.0876330947   | -0.0005330821 |
| 897.2000000000 | 3.7266203423   | -0.0004429995 |
| 898.6000000000 | 3.3963652670   | -0.0003678437 |
| 900.0000000000 | 3.0943642236   | -0.0003051960 |

Information on the absorption spectrum of Au<sub>56</sub>(SR)<sub>32</sub>:

# Spectra

| #              | X | Y            | DY/DX        |
|----------------|---|--------------|--------------|
| 200.0000000000 |   | 0.0000000000 | 0.0000000000 |
| 202.0000000000 |   | 0.0000000000 | 0.0000000000 |
| 204.0000000000 |   | 0.0000000000 | 0.0000000000 |
| 206.0000000000 |   | 0.0000000000 | 0.0000000000 |
| 208.0000000000 |   | 0.0000000000 | 0.0000000000 |
| 210.0000000000 |   | 0.0000000000 | 0.0000000000 |
| 212.0000000000 |   | 0.0000000000 | 0.0000000000 |
| 214.0000000000 |   | 0.0000000000 | 0.0000000000 |
| 216.0000000000 |   | 0.0000000000 | 0.0000000000 |
| 218.0000000000 |   | 0.0000000000 | 0.0000000000 |
| 220.0000000000 |   | 0.0000000000 | 0.0000000000 |
| 222.0000000000 |   | 0.0000000000 | 0.0000000000 |
| 224.0000000000 |   | 0.0000000000 | 0.0000000000 |
| 226.0000000000 |   | 0.0000000000 | 0.0000000000 |
| 228.0000000000 |   | 0.0000000000 | 0.0000000000 |
| 230.0000000000 |   | 0.0000000000 | 0.0000000000 |
| 232.0000000000 |   | 0.0000000000 | 0.0000000000 |
| 234.0000000000 |   | 0.0000000000 | 0.0000000000 |
| 236.0000000000 |   | 0.0000000000 | 0.0000000000 |
| 238.0000000000 |   | 0.0000000000 | 0.0000000000 |
| 240.0000000000 |   | 0.0000000000 | 0.0000000000 |
| 242.0000000000 |   | 0.0000000000 | 0.0000000000 |
| 244.0000000000 |   | 0.0000000000 | 0.0000000000 |
| 246.0000000000 |   | 0.0000000000 | 0.0000000000 |
| 248.0000000000 |   | 0.0000000000 | 0.0000000000 |
| 250.0000000000 |   | 0.0000000000 | 0.0000000000 |
| 252.0000000000 |   | 0.0000000000 | 0.0000000000 |
| 254.0000000000 |   | 0.0000000000 | 0.0000000000 |
| 256.0000000000 |   | 0.0000000000 | 0.0000000000 |
| 258.0000000000 |   | 0.0000000000 | 0.0000000000 |
| 260.0000000000 |   | 0.0000000000 | 0.0000000000 |
| 262.0000000000 |   | 0.0000000000 | 0.0000000000 |
| 264.0000000000 |   | 0.0000000000 | 0.0000000000 |
| 266.0000000000 |   | 0.0000000000 | 0.0000000000 |
| 268.0000000000 |   | 0.0000000000 | 0.0000000000 |
| 270.0000000000 |   | 0.0000000000 | 0.0000000000 |
| 272.0000000000 |   | 0.0000000000 | 0.0000000000 |
| 274.0000000000 |   | 0.0000000000 | 0.0000000000 |
| 276.0000000000 |   | 0.0000000000 | 0.0000000000 |
| 278.0000000000 |   | 0.0000000000 | 0.0000000000 |
| 280.0000000000 |   | 0.0000000000 | 0.0000000000 |



|                |                |              |
|----------------|----------------|--------------|
| 374.0000000000 | 0.0000000000   | 0.0000000000 |
| 376.0000000000 | 0.0000000000   | 0.0000000000 |
| 378.0000000000 | 0.0000000000   | 0.0000000000 |
| 380.0000000000 | 0.0000000000   | 0.0000000000 |
| 382.0000000000 | 0.0000000000   | 0.0000000000 |
| 384.0000000000 | 0.0000000000   | 0.0000000000 |
| 386.0000000000 | 0.0000000000   | 0.0000000000 |
| 388.0000000000 | 0.0000000000   | 0.0000000000 |
| 390.0000000000 | 0.0000000000   | 0.0000000000 |
| 392.0000000000 | 0.0000000000   | 0.0000000000 |
| 394.0000000000 | 0.0000000001   | 0.0000000000 |
| 396.0000000000 | 0.0000000006   | 0.0000000000 |
| 398.0000000000 | 0.0000000026   | 0.0000000000 |
| 400.0000000000 | 0.0000000102   | 0.0000000000 |
| 402.0000000000 | 0.0000000387   | 0.0000000000 |
| 404.0000000000 | 0.0000001406   | 0.0000000000 |
| 406.0000000000 | 0.0000004884   | 0.0000000000 |
| 408.0000000000 | 0.0000016255   | 0.0000000000 |
| 410.0000000000 | 0.0000051890   | 0.0000000000 |
| 412.0000000000 | 0.0000159040   | 0.0000000000 |
| 414.0000000000 | 0.0000468497   | 0.0000000000 |
| 416.0000000000 | 0.0001327759   | 0.0000000000 |
| 418.0000000000 | 0.0003623855   | 0.0000000000 |
| 420.0000000000 | 0.0009534017   | 0.0000000000 |
| 422.0000000000 | 0.0024201303   | 0.0000000002 |
| 424.0000000000 | 0.0059327077   | 0.0000000009 |
| 426.0000000000 | 0.0140573067   | 0.0000000052 |
| 428.0000000000 | 0.0322225658   | 0.0000000274 |
| 430.0000000000 | 0.0715140602   | 0.0000001342 |
| 432.0000000000 | 0.1537982966   | 0.0000006149 |
| 434.0000000000 | 0.3207651243   | 0.0000026404 |
| 436.0000000000 | 0.6492869542   | 0.0000106450 |
| 438.0000000000 | 1.2765283932   | 0.0000403554 |
| 440.0000000000 | 2.4394459127   | 0.0001440725 |
| 442.0000000000 | 4.5345488698   | 0.0004850779 |
| 444.0000000000 | 8.2047883238   | 0.0015424180 |
| 446.0000000000 | 14.4608090081  | 0.0046381515 |
| 448.0000000000 | 24.8430470077  | 0.0132073366 |
| 450.0000000000 | 41.6287455713  | 0.0356591945 |
| 452.0000000000 | 68.0834338063  | 0.0914020182 |
| 454.0000000000 | 108.7495395743 | 0.2226864265 |
| 456.0000000000 | 169.7557644865 | 0.5162915196 |
| 458.0000000000 | 259.1203599954 | 1.1403890369 |
| 460.0000000000 | 387.0108472167 | 2.4024000365 |
| 462.0000000000 | 565.9139066711 | 4.8320697966 |
| 464.0000000000 | 810.6643415800 | 9.2888448498 |



|                |                  |                 |
|----------------|------------------|-----------------|
| 466.0000000000 | 1138.2833552592  | 17.0828131307   |
| 468.0000000000 | 1567.5855196230  | 30.0841603962   |
| 470.0000000000 | 2118.5313754043  | 50.7798620348   |
| 472.0000000000 | 2811.3278302713  | 82.2236149132   |
| 474.0000000000 | 3665.3090925494  | 127.8234729852  |
| 476.0000000000 | 4697.6630734747  | 190.9288501343  |
| 478.0000000000 | 5922.0973480194  | 274.2183688124  |
| 480.0000000000 | 7347.5600144169  | 378.9489623038  |
| 482.0000000000 | 8977.1399303788  | 504.1919233018  |
| 484.0000000000 | 10807.2651240938 | 646.2328520967  |
| 486.0000000000 | 12827.2970952080 | 798.3273654271  |
| 488.0000000000 | 15019.5840307727 | 950.9670461162  |
| 490.0000000000 | 17359.9916684102 | 1092.7188331890 |
| 492.0000000000 | 19818.8822720263 | 1211.5724809587 |
| 494.0000000000 | 22362.4663037472 | 1296.5970580287 |
| 496.0000000000 | 24954.4139418766 | 1339.6074307060 |
| 498.0000000000 | 27557.5894067755 | 1336.5078682835 |
| 500.0000000000 | 30135.7629212245 | 1288.0272605991 |
| 502.0000000000 | 32655.1635001007 | 1199.6803474876 |
| 504.0000000000 | 35085.7587782278 | 1080.9517720553 |
| 506.0000000000 | 37402.1819999679 | 943.8625147437  |
| 508.0000000000 | 39584.2661716258 | 801.2001351391  |
| 510.0000000000 | 41617.1859107848 | 664.7471251930  |
| 512.0000000000 | 43491.2438390257 | 543.8176976479  |
| 514.0000000000 | 45201.3666573218 | 444.3252128621  |
| 516.0000000000 | 46746.3940006687 | 368.4776482517  |
| 518.0000000000 | 48128.2500868059 | 315.0699080469  |
| 520.0000000000 | 49351.0848352883 | 280.2381844611  |
| 522.0000000000 | 50420.4594791793 | 258.4810838490  |
| 524.0000000000 | 51342.6343805405 | 243.7396180421  |
| 526.0000000000 | 52123.9966956985 | 230.3565090049  |
| 528.0000000000 | 52770.6454399256 | 213.7902159237  |
| 530.0000000000 | 53288.1335941655 | 191.0240721317  |
| 532.0000000000 | 53681.3527050575 | 160.6714757095  |
| 534.0000000000 | 53954.5357274941 | 122.8245582563  |
| 536.0000000000 | 54111.3487237675 | 78.7219454681   |
| 538.0000000000 | 54155.0409854226 | 30.3214619505   |
| 540.0000000000 | 54088.6253306811 | -20.1408349172  |
| 542.0000000000 | 53915.0647195259 | -70.5386214639  |
| 544.0000000000 | 53637.4468813452 | -119.1441239839 |
| 546.0000000000 | 53259.1344540264 | -164.7941701097 |
| 548.0000000000 | 52783.8834867974 | -206.9314208759 |
| 550.0000000000 | 52215.9276059885 | -245.5370299368 |
| 552.0000000000 | 51560.0284664785 | -280.9843417700 |
| 554.0000000000 | 50821.4952972376 | -313.8506090569 |
| 556.0000000000 | 50006.1775298793 | -344.7247378721 |

|                |                  |                 |
|----------------|------------------|-----------------|
| 558.0000000000 | 49120.4348946400 | -374.0442380575 |
| 560.0000000000 | 48171.0892306057 | -401.9851634900 |
| 562.0000000000 | 47165.3618252752 | -428.4168107773 |
| 564.0000000000 | 46110.7995686000 | -452.9205433573 |
| 566.0000000000 | 45015.1927158998 | -474.8614377859 |
| 568.0000000000 | 43886.4866790673 | -493.4941131725 |
| 570.0000000000 | 42732.6900292516 | -508.0809293835 |
| 572.0000000000 | 41561.7807795586 | -518.0016977316 |
| 574.0000000000 | 40381.6129815471 | -522.8383703975 |
| 576.0000000000 | 39199.8256633201 | -522.4246016210 |
| 578.0000000000 | 38023.7561116289 | -516.8571677506 |
| 580.0000000000 | 36860.3594188334 | -506.4726792809 |
| 582.0000000000 | 35716.1360567639 | -491.7978444820 |
| 584.0000000000 | 34597.0689989028 | -473.4842366019 |
| 586.0000000000 | 33508.5715995218 | -452.2390211730 |
| 588.0000000000 | 32455.4470734589 | -428.7617405448 |
| 590.0000000000 | 31441.8600287815 | -403.6945965332 |
| 592.0000000000 | 30471.3201134987 | -377.5903814238 |
| 594.0000000000 | 29546.6774710598 | -350.8989095568 |
| 596.0000000000 | 28670.1293768209 | -323.9699941594 |
| 598.0000000000 | 27843.2371617345 | -297.0690158216 |
| 600.0000000000 | 27066.9523264163 | -270.4000713540 |
| 602.0000000000 | 26341.6506087215 | -244.1315416406 |
| 604.0000000000 | 25667.1726867068 | -218.4195195162 |
| 606.0000000000 | 25042.8701689504 | -193.4256665170 |
| 608.0000000000 | 24467.6555367603 | -169.3274688625 |
| 610.0000000000 | 23940.0547486610 | -146.3203009954 |
| 612.0000000000 | 23458.2612883811 | -124.6119841835 |
| 614.0000000000 | 23020.1905263224 | -104.4115104221 |
| 616.0000000000 | 22623.5333657486 | -85.9142130597  |
| 618.0000000000 | 22265.8082547244 | -69.2858891917  |
| 620.0000000000 | 21944.4107604187 | -54.6482485996  |
| 622.0000000000 | 21656.6600218530 | -42.0676502657  |
| 624.0000000000 | 21399.8415190324 | -31.5484828637  |
| 626.0000000000 | 21171.2457192514 | -23.0318506087  |
| 628.0000000000 | 20968.2022836652 | -16.3995360774  |
| 630.0000000000 | 20788.1096371283 | -11.4826076383  |
| 632.0000000000 | 20628.4598197252 | -8.0735795310   |
| 634.0000000000 | 20486.8586470478 | -5.9407505622   |
| 636.0000000000 | 20361.0413057960 | -4.8432506196   |
| 638.0000000000 | 20248.8835995231 | -4.5453981239   |
| 640.0000000000 | 20148.4091345002 | -4.8291842930   |
| 642.0000000000 | 20057.7927964254 | -5.5040090603   |
| 644.0000000000 | 19975.3609143451 | -6.4131519338   |
| 646.0000000000 | 19899.5885386396 | -7.4368242706   |
| 648.0000000000 | 19829.0942758362 | -8.4919794044   |

|                |                  |                 |
|----------------|------------------|-----------------|
| 650.0000000000 | 19762.6331255053 | -9.5293256950   |
| 652.0000000000 | 19699.0877551644 | -10.5281779934  |
| 654.0000000000 | 19637.4586298769 | -11.4898892638  |
| 656.0000000000 | 19576.8533861490 | -12.4306296281  |
| 658.0000000000 | 19516.4758068781 | -13.3742354852  |
| 660.0000000000 | 19455.6147174413 | -14.3457516781  |
| 662.0000000000 | 19393.6330842739 | -15.3661520668  |
| 664.0000000000 | 19329.9575579202 | -16.4485653386  |
| 666.0000000000 | 19264.0686636675 | -17.5961688856  |
| 668.0000000000 | 19195.4918053075 | -18.8017569997  |
| 670.0000000000 | 19123.7892118132 | -20.0488504582  |
| 672.0000000000 | 19048.5529230442 | -21.3140998675  |
| 674.0000000000 | 18969.3988790722 | -22.5706493686  |
| 676.0000000000 | 18885.9621483164 | -23.7920727036  |
| 678.0000000000 | 18797.8933023021 | -24.9564705997  |
| 680.0000000000 | 18704.8559194102 | -26.0503258036  |
| 682.0000000000 | 18606.5251764244 | -27.0717474751  |
| 684.0000000000 | 18502.5874650331 | -28.0327964299  |
| 686.0000000000 | 18392.7409508098 | -28.9606622667  |
| 688.0000000000 | 18276.6969747757 | -29.8975571439  |
| 690.0000000000 | 18154.1821826934 | -30.8992925351  |
| 692.0000000000 | 18024.9412550448 | -32.0326078363  |
| 694.0000000000 | 17888.7401015176 | -33.3714162184  |
| 696.0000000000 | 17745.3693780268 | -34.9922169181  |
| 698.0000000000 | 17594.6481820418 | -36.9689882943  |
| 700.0000000000 | 17436.4277834015 | -39.3679177945  |
| 702.0000000000 | 17270.5952528659 | -42.2423404621  |
| 704.0000000000 | 17097.0768592559 | -45.6282457297  |
| 706.0000000000 | 16915.8411179195 | -49.5406740430  |
| 708.0000000000 | 16726.9013880219 | -53.9712634203  |
| 710.0000000000 | 16530.3179333147 | -58.8871262512  |
| 712.0000000000 | 16326.1993799779 | -64.2311447357  |
| 714.0000000000 | 16114.7035252017 | -69.9236764552  |
| 716.0000000000 | 15896.0374706811 | -75.8655670006  |
| 718.0000000000 | 15670.4570754423 | -81.9422813070  |
| 720.0000000000 | 15438.2657417389 | -88.0288953782  |
| 722.0000000000 | 15199.8125655346 | -93.9956400231  |
| 724.0000000000 | 14955.4898988137 | -99.7136609367  |
| 726.0000000000 | 14705.7303842002 | -105.0606559247 |
| 728.0000000000 | 14451.0035328226 | -109.9260694233 |
| 730.0000000000 | 14191.8119238584 | -114.2155641390 |
| 732.0000000000 | 13928.6871086703 | -117.8545457088 |
| 734.0000000000 | 13662.1853039756 | -120.7905838783 |
| 736.0000000000 | 13392.8829572458 | -122.9946474061 |
| 738.0000000000 | 13121.3722637855 | -124.4611443157 |
| 740.0000000000 | 12848.2567090330 | -125.2068291435 |

|                |                  |                 |
|----------------|------------------|-----------------|
| 742.0000000000 | 12574.1467019589 | -125.2687001606 |
| 744.0000000000 | 12299.6553564638 | -124.7010588321 |
| 746.0000000000 | 12025.3944678178 | -123.5719388159 |
| 748.0000000000 | 11751.9707209176 | -121.9591315960 |
| 750.0000000000 | 11479.9821568555 | -119.9460405262 |
| 752.0000000000 | 11210.0149144059 | -117.6175857671 |
| 754.0000000000 | 10942.6402538462 | -115.0563612899 |
| 756.0000000000 | 10678.4118623373 | -112.3392143323 |
| 758.0000000000 | 10417.8634330813 | -109.5343802883 |
| 760.0000000000 | 10161.5065048026 | -106.6992649630 |
| 762.0000000000 | 9909.8285438342  | -103.8789242687 |
| 764.0000000000 | 9663.2912482411  | -101.1052513221 |
| 766.0000000000 | 9422.3290519394  | -98.3968446469  |
| 768.0000000000 | 9187.3478065660  | -95.7595003969  |
| 770.0000000000 | 8958.7236197958  | -93.1872472541  |
| 772.0000000000 | 8736.8018307128  | -90.6638254514  |
| 774.0000000000 | 8521.8961055302  | -88.1645012519  |
| 776.0000000000 | 8314.2876402280  | -85.6581047971  |
| 778.0000000000 | 8114.2244603167  | -83.1091817890  |
| 780.0000000000 | 7921.9208117485  | -80.4801570304  |
| 782.0000000000 | 7737.5566407955  | -77.7334193103  |
| 784.0000000000 | 7561.2771643183  | -74.8332513188  |
| 786.0000000000 | 7393.1925351190  | -71.7475440844  |
| 788.0000000000 | 7233.3776098751  | -68.4492517904  |
| 790.0000000000 | 7081.8718294036  | -64.9175588420  |
| 792.0000000000 | 6938.6792226241  | -61.1387459813  |
| 794.0000000000 | 6803.7685465523  | -57.1067555153  |
| 796.0000000000 | 6677.0735749403  | -52.8234669730  |
| 798.0000000000 | 6558.4935477993  | -48.2987035174  |
| 800.0000000000 | 6447.8937930376  | -43.5499961806  |
| 802.0000000000 | 6345.1065298678  | -38.6021375310  |
| 804.0000000000 | 6249.9318615545  | -33.4865589136  |
| 806.0000000000 | 6162.1389625731  | -28.2405661803  |
| 808.0000000000 | 6081.4674624171  | -22.9064681523  |
| 810.0000000000 | 6007.6290252228  | -17.5306302417  |
| 812.0000000000 | 5940.3091211757  | -12.1624830352  |
| 814.0000000000 | 5879.1689824116  | -6.8535124928   |
| 816.0000000000 | 5823.8477329277  | -1.6562550089   |
| 818.0000000000 | 5773.9646789496  | 3.3766828647    |
| 820.0000000000 | 5729.1217433446  | 8.1935635430    |
| 822.0000000000 | 5688.9060250905  | 12.7444029489   |
| 824.0000000000 | 5652.8924625618  | 16.9817897611   |
| 826.0000000000 | 5620.6465775244  | 20.8616310117   |
| 828.0000000000 | 5591.7272752704  | 24.3438176608   |
| 830.0000000000 | 5565.6896752949  | 27.3928054124   |
| 832.0000000000 | 5542.0879463294  | 29.9781073839   |

|                |                 |                |
|----------------|-----------------|----------------|
| 834.0000000000 | 5520.4781193981 | 32.0746963448  |
| 836.0000000000 | 5500.4208528489 | 33.6633151799  |
| 838.0000000000 | 5481.4841239989 | 34.7306950616  |
| 840.0000000000 | 5463.2458231164 | 35.2696815909  |
| 842.0000000000 | 5445.2962268842 | 35.2792699493  |
| 844.0000000000 | 5427.2403302268 | 34.7645509063  |
| 846.0000000000 | 5408.7000173909 | 33.7365703926  |
| 848.0000000000 | 5389.3160553968 | 32.2121062684  |
| 850.0000000000 | 5368.7498953798 | 30.2133668874  |
| 852.0000000000 | 5346.6852698736 | 27.7676170675  |
| 854.0000000000 | 5322.8295766992 | 24.9067380875  |
| 856.0000000000 | 5296.9150427679 | 21.6667293165  |
| 858.0000000000 | 5268.6996637448 | 18.0871599952  |
| 860.0000000000 | 5237.9679181065 | 14.2105805040  |
| 862.0000000000 | 5204.5312566280 | 10.0819031119  |
| 864.0000000000 | 5168.2283707145 | 5.7477626966   |
| 866.0000000000 | 5128.9252452235 | 1.2558682078   |
| 868.0000000000 | 5086.5150034850 | -3.3456442911  |
| 870.0000000000 | 5040.9175540841 | -8.0088463337  |
| 872.0000000000 | 4992.0790506326 | -12.6866292548 |
| 874.0000000000 | 4939.9711771822 | -17.3332842519 |
| 876.0000000000 | 4884.5902731428 | -21.9050415140 |
| 878.0000000000 | 4825.9563125407 | -26.3605606488 |
| 880.0000000000 | 4764.1117531995 | -30.6613658212 |
| 882.0000000000 | 4699.1202719451 | -34.7722203163 |
| 884.0000000000 | 4631.0654022378 | -38.6614366227 |
| 886.0000000000 | 4560.0490907322 | -42.3011195535 |
| 888.0000000000 | 4486.1901891604 | -45.6673413506 |
| 890.0000000000 | 4409.6228976579 | -48.7402491039 |
| 892.0000000000 | 4330.4951752013 | -51.5041061349 |
| 894.0000000000 | 4248.9671322372 | -53.9472702069 |
| 896.0000000000 | 4165.2094198555 | -56.0621125078 |
| 898.0000000000 | 4079.4016290286 | -57.8448822833 |
| 900.0000000000 | 3991.7307125083 | -59.2955227638 |
| 902.0000000000 | 3902.3894409724 | -60.4174446216 |
| 904.0000000000 | 3811.5749039531 | -61.2172636056 |
| 906.0000000000 | 3719.4870649810 | -61.7045092361 |
| 908.0000000000 | 3626.3273792576 | -61.8913115120 |
| 910.0000000000 | 3532.2974810389 | -61.7920724866 |
| 912.0000000000 | 3437.5979467893 | -61.4231293380 |
| 914.0000000000 | 3342.4271390595 | -60.8024151945 |
| 916.0000000000 | 3246.9801349686 | -59.9491235140 |
| 918.0000000000 | 3151.4477421341 | -58.8833812598 |
| 920.0000000000 | 3056.0156039122 | -57.6259355027 |
| 922.0000000000 | 2960.8633948777 | -56.1978574173 |
| 924.0000000000 | 2866.1641066088 | -54.6202669594 |

|                 |                 |                |
|-----------------|-----------------|----------------|
| 926.0000000000  | 2772.0834230433 | -52.9140808237 |
| 928.0000000000  | 2678.7791839418 | -51.0997856033 |
| 930.0000000000  | 2586.4009343376 | -49.1972374282 |
| 932.0000000000  | 2495.0895572718 | -47.2254887455 |
| 934.0000000000  | 2404.9769866007 | -45.2026423474 |
| 936.0000000000  | 2316.1859962277 | -43.1457322472 |
| 938.0000000000  | 2228.8300617471 | -41.0706305623 |
| 940.0000000000  | 2143.0132901909 | -38.9919791888 |
| 942.0000000000  | 2058.8304133403 | -36.9231447382 |
| 944.0000000000  | 1976.3668398957 | -34.8761949673 |
| 946.0000000000  | 1895.6987616895 | -32.8618947463 |
| 948.0000000000  | 1816.8933090753 | -30.8897194926 |
| 950.0000000000  | 1740.0087506176 | -28.9678839286 |
| 952.0000000000  | 1665.0947322515 | -27.1033840078 |
| 954.0000000000  | 1592.1925511640 | -25.3020498787 |
| 956.0000000000  | 1521.3354597624 | -23.5686078242 |
| 958.0000000000  | 1452.5489952523 | -21.9067492072 |
| 960.0000000000  | 1385.8513305167 | -20.3192045806 |
| 962.0000000000  | 1321.2536421953 | -18.8078212556 |
| 964.0000000000  | 1258.7604920731 | -17.3736427835 |
| 966.0000000000  | 1198.3702181275 | -16.0169889657 |
| 968.0000000000  | 1140.0753318208 | -14.7375351792 |
| 970.0000000000  | 1083.8629184792 | -13.5343899698 |
| 972.0000000000  | 1029.7150378523 | -12.4061700326 |
| 974.0000000000  | 977.6091222057  | -11.3510718571 |
| 976.0000000000  | 927.5183695505  | -10.3669394649 |
| 978.0000000000  | 879.4121298691  | -9.4513278067  |
| 980.0000000000  | 833.2562824382  | -8.6015615130  |
| 982.0000000000  | 789.0136025913  | -7.8147888109  |
| 984.0000000000  | 746.6441164892  | -7.0880305161  |
| 986.0000000000  | 706.1054426875  | -6.4182241045  |
| 988.0000000000  | 667.3531194987  | -5.8022629388  |
| 990.0000000000  | 630.3409173383  | -5.2370307917  |
| 992.0000000000  | 595.0211354327  | -4.7194318590  |
| 994.0000000000  | 561.3448824321  | -4.2464164958  |
| 996.0000000000  | 529.2623406310  | -3.8150029394  |
| 998.0000000000  | 498.7230136427  | -3.4222953067  |
| 1000.0000000000 | 469.6759575034  | -3.0654981636  |
| 1002.0000000000 | 442.0699953009  | -2.7419279723  |
| 1004.0000000000 | 415.8539155259  | -2.4490217249  |
| 1006.0000000000 | 390.9766544397  | -2.1843430604  |
| 1008.0000000000 | 367.3874628295  | -1.9455861616  |
| 1010.0000000000 | 345.0360575971  | -1.7305777082  |
| 1012.0000000000 | 323.8727586809  | -1.5372771535  |
| 1014.0000000000 | 303.8486118654  | -1.3637755703  |
| 1016.0000000000 | 284.9154980698  | -1.2082932979  |

|                 |                |               |
|-----------------|----------------|---------------|
| 1018.0000000000 | 267.0262297389 | -1.0691765987 |
| 1020.0000000000 | 250.1346349841 | -0.9448935176 |
| 1022.0000000000 | 234.1956301375 | -0.8340291156 |
| 1024.0000000000 | 219.1652813930 | -0.7352802315 |
| 1026.0000000000 | 205.0008562088 | -0.6474499072 |
| 1028.0000000000 | 191.6608651489 | -0.5694415955 |
| 1030.0000000000 | 179.1050948289 | -0.5002532516 |
| 1032.0000000000 | 167.2946326261 | -0.4389713962 |
| 1034.0000000000 | 156.1918837950 | -0.3847652244 |
| 1036.0000000000 | 145.7605816151 | -0.3368808191 |
| 1038.0000000000 | 135.9657911761 | -0.2946355208 |
| 1040.0000000000 | 126.7739073844 | -0.2574124902 |
| 1042.0000000000 | 118.1526477495 | -0.2246554972 |
| 1044.0000000000 | 110.0710404855 | -0.1958639541 |
| 1046.0000000000 | 102.4994084349 | -0.1705882133 |
| 1048.0000000000 | 95.4093492961  | -0.1484251336 |
| 1050.0000000000 | 88.7737126074  | -0.1290139247 |
| 1052.0000000000 | 82.5665739148  | -0.1120322647 |
| 1054.0000000000 | 76.7632065205  | -0.0971926921 |
| 1056.0000000000 | 71.3400511856  | -0.0842392624 |
| 1058.0000000000 | 66.2746841302  | -0.0729444623 |
| 1060.0000000000 | 61.5457836508  | -0.0631063722 |
| 1062.0000000000 | 57.1330956484  | -0.0545460629 |
| 1064.0000000000 | 53.0173983361  | -0.0471052176 |
| 1066.0000000000 | 49.1804663717  | -0.0406439626 |
| 1068.0000000000 | 45.6050346394  | -0.0350388966 |
| 1070.0000000000 | 42.2747618811  | -0.0301813033 |
| 1072.0000000000 | 39.1741943592  | -0.0259755351 |
| 1074.0000000000 | 36.2887297127  | -0.0223375552 |
| 1076.0000000000 | 33.6045811505  | -0.0191936243 |
| 1078.0000000000 | 31.1087421084  | -0.0164791221 |
| 1080.0000000000 | 28.7889514814  | -0.0141374904 |
| 1082.0000000000 | 26.6336595258  | -0.0121192880 |
| 1084.0000000000 | 24.6319945155  | -0.0103813470 |
| 1086.0000000000 | 22.7737302198  | -0.0088860212 |
| 1088.0000000000 | 21.0492542616  | -0.0076005173 |
| 1090.0000000000 | 19.4495374035  | -0.0064963021 |
| 1092.0000000000 | 17.9661037975  | -0.0055485759 |
| 1094.0000000000 | 16.5910022276  | -0.0047358074 |
| 1096.0000000000 | 15.3167783651  | -0.0040393231 |
| 1098.0000000000 | 14.1364480497  | -0.0034429444 |
| 1100.0000000000 | 13.0434716021  | -0.0029326688 |
| 1102.0000000000 | 12.0317291694  | -0.0024963893 |
| 1104.0000000000 | 11.0954970972  | -0.0021236478 |
| 1106.0000000000 | 10.2294253210  | -0.0018054194 |
| 1108.0000000000 | 9.4285157616   | -0.0015339234 |

|                 |              |               |
|-----------------|--------------|---------------|
| 1110.0000000000 | 8.6881017092 | -0.0013024576 |
| 1112.0000000000 | 8.0038281763 | -0.0011052543 |
| 1114.0000000000 | 7.3716331961 | -0.0009373547 |
| 1116.0000000000 | 6.7877300433 | -0.0007944983 |
| 1118.0000000000 | 6.2485903511 | -0.0006730286 |
| 1120.0000000000 | 5.7509280962 | -0.0005698096 |
| 1122.0000000000 | 5.2916844238 | -0.0004821539 |
| 1124.0000000000 | 4.8680132838 | -0.0004077608 |
| 1126.0000000000 | 4.4772678472 | -0.0003446618 |
| 1128.0000000000 | 4.1169876739 | -0.0002911739 |
| 1130.0000000000 | 3.7848866005 | -0.0002458598 |
| 1132.0000000000 | 3.4788413183 | -0.0002074923 |
| 1134.0000000000 | 3.1968806122 | -0.0001750248 |
| 1136.0000000000 | 2.9371752297 | -0.0001475654 |
| 1138.0000000000 | 2.6980283513 | -0.0001243540 |
| 1140.0000000000 | 2.4778666343 | -0.0001047441 |
| 1142.0000000000 | 2.2752318008 | -0.0000881856 |
| 1144.0000000000 | 2.0887727440 | -0.0000742107 |
| 1146.0000000000 | 1.9172381251 | -0.0000624225 |
| 1148.0000000000 | 1.7594694360 | -0.0000524836 |
| 1150.0000000000 | 1.6143945024 | -0.0000441081 |
| 1152.0000000000 | 1.4810214041 | -0.0000370535 |
| 1154.0000000000 | 1.3584327882 | -0.0000311141 |
| 1156.0000000000 | 1.2457805550 | -0.0000261161 |
| 1158.0000000000 | 1.1422808928 | -0.0000219121 |
| 1160.0000000000 | 1.0472096442 | -0.0000183776 |
| 1162.0000000000 | 0.9598979818 | -0.0000154072 |
| 1164.0000000000 | 0.8797283770 | -0.0000129120 |
| 1166.0000000000 | 0.8061308422 | -0.0000108169 |
| 1168.0000000000 | 0.7385794319 | -0.0000090584 |
| 1170.0000000000 | 0.6765889841 | -0.0000075831 |
| 1172.0000000000 | 0.6197120896 | -0.0000063458 |
| 1174.0000000000 | 0.5675362729 | -0.0000053086 |
| 1176.0000000000 | 0.5196813716 | -0.0000044393 |
| 1178.0000000000 | 0.4757971023 | -0.0000037112 |
| 1180.0000000000 | 0.4355607993 | -0.0000031015 |
| 1182.0000000000 | 0.3986753167 | -0.0000025911 |
| 1184.0000000000 | 0.3648670812 | -0.0000021641 |
| 1186.0000000000 | 0.3338842862 | -0.0000018069 |
| 1188.0000000000 | 0.3054952186 | -0.0000015081 |
| 1190.0000000000 | 0.2794867074 | -0.0000012584 |
| 1192.0000000000 | 0.2556626872 | -0.0000010498 |
| 1194.0000000000 | 0.2338428686 | -0.0000008755 |
| 1196.0000000000 | 0.2138615066 | -0.0000007299 |
| 1198.0000000000 | 0.1955662624 | -0.0000006084 |



Information on the absorption spectrum of Au<sub>60</sub>(SR)<sub>34</sub>:

| # Spectra<br># | X              | Y            | DY/DX        |
|----------------|----------------|--------------|--------------|
|                | 200.0000000000 | 0.0000000000 | 0.0000000000 |
|                | 202.0000000000 | 0.0000000000 | 0.0000000000 |
|                | 204.0000000000 | 0.0000000000 | 0.0000000000 |
|                | 206.0000000000 | 0.0000000000 | 0.0000000000 |
|                | 208.0000000000 | 0.0000000000 | 0.0000000000 |
|                | 210.0000000000 | 0.0000000000 | 0.0000000000 |
|                | 212.0000000000 | 0.0000000000 | 0.0000000000 |
|                | 214.0000000000 | 0.0000000000 | 0.0000000000 |
|                | 216.0000000000 | 0.0000000000 | 0.0000000000 |
|                | 218.0000000000 | 0.0000000000 | 0.0000000000 |
|                | 220.0000000000 | 0.0000000000 | 0.0000000000 |
|                | 222.0000000000 | 0.0000000000 | 0.0000000000 |
|                | 224.0000000000 | 0.0000000000 | 0.0000000000 |
|                | 226.0000000000 | 0.0000000000 | 0.0000000000 |
|                | 228.0000000000 | 0.0000000000 | 0.0000000000 |
|                | 230.0000000000 | 0.0000000000 | 0.0000000000 |
|                | 232.0000000000 | 0.0000000000 | 0.0000000000 |
|                | 234.0000000000 | 0.0000000000 | 0.0000000000 |
|                | 236.0000000000 | 0.0000000000 | 0.0000000000 |
|                | 238.0000000000 | 0.0000000000 | 0.0000000000 |
|                | 240.0000000000 | 0.0000000000 | 0.0000000000 |
|                | 242.0000000000 | 0.0000000000 | 0.0000000000 |
|                | 244.0000000000 | 0.0000000000 | 0.0000000000 |
|                | 246.0000000000 | 0.0000000000 | 0.0000000000 |
|                | 248.0000000000 | 0.0000000000 | 0.0000000000 |
|                | 250.0000000000 | 0.0000000000 | 0.0000000000 |
|                | 252.0000000000 | 0.0000000000 | 0.0000000000 |
|                | 254.0000000000 | 0.0000000000 | 0.0000000000 |
|                | 256.0000000000 | 0.0000000000 | 0.0000000000 |
|                | 258.0000000000 | 0.0000000000 | 0.0000000000 |
|                | 260.0000000000 | 0.0000000000 | 0.0000000000 |
|                | 262.0000000000 | 0.0000000000 | 0.0000000000 |
|                | 264.0000000000 | 0.0000000000 | 0.0000000000 |
|                | 266.0000000000 | 0.0000000000 | 0.0000000000 |
|                | 268.0000000000 | 0.0000000000 | 0.0000000000 |
|                | 270.0000000000 | 0.0000000000 | 0.0000000000 |
|                | 272.0000000000 | 0.0000000000 | 0.0000000000 |
|                | 274.0000000000 | 0.0000000000 | 0.0000000000 |
|                | 276.0000000000 | 0.0000000000 | 0.0000000000 |
|                | 278.0000000000 | 0.0000000000 | 0.0000000000 |
|                | 280.0000000000 | 0.0000000000 | 0.0000000000 |
|                | 282.0000000000 | 0.0000000000 | 0.0000000000 |



|                |              |              |
|----------------|--------------|--------------|
| 376.0000000000 | 0.0000000000 | 0.0000000000 |
| 378.0000000000 | 0.0000000000 | 0.0000000000 |
| 380.0000000000 | 0.0000000000 | 0.0000000000 |
| 382.0000000000 | 0.0000000000 | 0.0000000000 |
| 384.0000000000 | 0.0000000000 | 0.0000000000 |
| 386.0000000000 | 0.0000000000 | 0.0000000000 |
| 388.0000000000 | 0.0000000000 | 0.0000000000 |
| 390.0000000000 | 0.0000000000 | 0.0000000000 |
| 392.0000000000 | 0.0000000000 | 0.0000000000 |
| 394.0000000000 | 0.0000000000 | 0.0000000000 |
| 396.0000000000 | 0.0000000000 | 0.0000000000 |
| 398.0000000000 | 0.0000000000 | 0.0000000000 |
| 400.0000000000 | 0.0000000000 | 0.0000000000 |
| 402.0000000000 | 0.0000000000 | 0.0000000000 |
| 404.0000000000 | 0.0000000000 | 0.0000000000 |
| 406.0000000000 | 0.0000000000 | 0.0000000000 |
| 408.0000000000 | 0.0000000000 | 0.0000000000 |
| 410.0000000000 | 0.0000000000 | 0.0000000000 |
| 412.0000000000 | 0.0000000000 | 0.0000000000 |
| 414.0000000000 | 0.0000000000 | 0.0000000000 |
| 416.0000000000 | 0.0000000000 | 0.0000000000 |
| 418.0000000000 | 0.0000000000 | 0.0000000000 |
| 420.0000000000 | 0.0000000001 | 0.0000000000 |
| 422.0000000000 | 0.0000000003 | 0.0000000000 |
| 424.0000000000 | 0.0000000009 | 0.0000000000 |
| 426.0000000000 | 0.0000000032 | 0.0000000000 |
| 428.0000000000 | 0.0000000107 | 0.0000000000 |
| 430.0000000000 | 0.0000000343 | 0.0000000000 |
| 432.0000000000 | 0.0000001062 | 0.0000000000 |
| 434.0000000000 | 0.0000003182 | 0.0000000000 |
| 436.0000000000 | 0.0000009219 | 0.0000000000 |
| 438.0000000000 | 0.0000025849 | 0.0000000000 |
| 440.0000000000 | 0.0000070200 | 0.0000000000 |
| 442.0000000000 | 0.0000184791 | 0.0000000000 |
| 444.0000000000 | 0.0000471853 | 0.0000000000 |
| 446.0000000000 | 0.0001169563 | 0.0000000000 |
| 448.0000000000 | 0.0002816030 | 0.0000000000 |
| 450.0000000000 | 0.0006590920 | 0.0000000000 |
| 452.0000000000 | 0.0015005159 | 0.0000000001 |
| 454.0000000000 | 0.0033251002 | 0.0000000003 |
| 456.0000000000 | 0.0071765439 | 0.0000000012 |
| 458.0000000000 | 0.0150953353 | 0.0000000052 |
| 460.0000000000 | 0.0309635612 | 0.0000000217 |
| 462.0000000000 | 0.0619722754 | 0.0000000863 |
| 464.0000000000 | 0.1210971774 | 0.0000003264 |
| 466.0000000000 | 0.2311566686 | 0.0000011743 |

|                |                  |                 |
|----------------|------------------|-----------------|
| 468.0000000000 | 0.4312754800     | 0.0000040252    |
| 470.0000000000 | 0.7868893001     | 0.0000131590    |
| 472.0000000000 | 1.4047928949     | 0.0000410733    |
| 474.0000000000 | 2.4551319137     | 0.0001225329    |
| 476.0000000000 | 4.2026215851     | 0.0003497402    |
| 478.0000000000 | 7.0495737652     | 0.0009560308    |
| 480.0000000000 | 11.5934321644    | 0.0025052713    |
| 482.0000000000 | 18.7013385231    | 0.0062995125    |
| 484.0000000000 | 29.6036553792    | 0.0152135685    |
| 486.0000000000 | 46.0072383603    | 0.0353199525    |
| 488.0000000000 | 70.2275007728    | 0.0788964056    |
| 490.0000000000 | 105.3359255419   | 0.1697134143    |
| 492.0000000000 | 155.3167232847   | 0.3518531102    |
| 494.0000000000 | 225.2229894702   | 0.7036360919    |
| 496.0000000000 | 321.3192754630   | 1.3583835808    |
| 498.0000000000 | 451.1943633278   | 2.5335029536    |
| 500.0000000000 | 623.8257053679   | 4.5684949684    |
| 502.0000000000 | 849.5759641046   | 7.9707041136    |
| 504.0000000000 | 1140.1028301725  | 13.4648652451   |
| 506.0000000000 | 1508.1661460610  | 22.0389003094   |
| 508.0000000000 | 1967.3214685037  | 34.9745256309   |
| 510.0000000000 | 2531.4964535348  | 53.8479905565   |
| 512.0000000000 | 3214.4554545736  | 80.4849380132   |
| 514.0000000000 | 4029.1678189537  | 116.8552545441  |
| 516.0000000000 | 4987.1056593237  | 164.8997993092  |
| 518.0000000000 | 6097.5063307467  | 226.2912022524  |
| 520.0000000000 | 7366.6424046322  | 302.1444934335  |
| 522.0000000000 | 8797.1466426064  | 392.7079429086  |
| 524.0000000000 | 10387.4406098457 | 497.0770005628  |
| 526.0000000000 | 12131.3127293328 | 612.9812024787  |
| 528.0000000000 | 14017.6847591083 | 736.6925438344  |
| 530.0000000000 | 16030.5952755991 | 863.0927907060  |
| 532.0000000000 | 18149.4155441821 | 985.9172841593  |
| 534.0000000000 | 20349.2982256765 | 1098.1669218000 |
| 536.0000000000 | 22601.8439584428 | 1192.6527952020 |
| 538.0000000000 | 24875.9562722821 | 1262.6147003958 |
| 540.0000000000 | 27138.8427469494 | 1302.3401502071 |
| 542.0000000000 | 29357.1108309082 | 1307.7076441977 |
| 544.0000000000 | 31497.9009901616 | 1276.5874364360 |
| 546.0000000000 | 33529.9982119148 | 1209.0530101049 |
| 548.0000000000 | 35424.8653231309 | 1107.3830293464 |
| 550.0000000000 | 37157.5477352154 | 975.8617319563  |
| 552.0000000000 | 38707.4084426799 | 820.4106517310  |
| 554.0000000000 | 40058.6635307528 | 648.1023923013  |
| 556.0000000000 | 41200.7011184421 | 466.6158312225  |
| 558.0000000000 | 42128.1795963000 | 283.6914684705  |

|                |                  |                 |
|----------------|------------------|-----------------|
| 560.0000000000 | 42840.9132968841 | 106.6371895323  |
| 562.0000000000 | 43343.5645820973 | -58.0788536795  |
| 564.0000000000 | 43645.1701512513 | -205.1271728004 |
| 566.0000000000 | 43758.5357828710 | -330.5015161683 |
| 568.0000000000 | 43699.5375520073 | -431.5950451688 |
| 570.0000000000 | 43486.3688428501 | -507.1823512008 |
| 572.0000000000 | 43138.7714044065 | -557.3258537070 |
| 574.0000000000 | 42677.2856086765 | -583.2260612048 |
| 576.0000000000 | 42122.5503904206 | -587.0337922477 |
| 578.0000000000 | 41494.6775474521 | -571.6398736301 |
| 580.0000000000 | 40812.7186410201 | -540.4550243010 |
| 582.0000000000 | 40094.2361125952 | -497.1902346319 |
| 584.0000000000 | 39354.9838299469 | -445.6462285175 |
| 586.0000000000 | 38608.6964253214 | -389.5194937199 |
| 588.0000000000 | 37866.9817445668 | -332.2316155142 |
| 590.0000000000 | 37139.3066565980 | -276.7879038786 |
| 592.0000000000 | 36433.0634642817 | -225.6702626672 |
| 594.0000000000 | 35753.7022228659 | -180.7677358116 |
| 596.0000000000 | 35104.9133591004 | -143.3461700057 |
| 598.0000000000 | 34488.8449912649 | -114.0560984322 |
| 600.0000000000 | 33906.3401388927 | -92.9755265566  |
| 602.0000000000 | 33357.1804198239 | -79.6820832383  |
| 604.0000000000 | 32840.3246904226 | -73.3472610983  |
| 606.0000000000 | 32354.1332232315 | -72.8444080860  |
| 608.0000000000 | 31896.5702771450 | -76.8618419086  |
| 610.0000000000 | 31465.3801590916 | -84.0129241601  |
| 612.0000000000 | 31058.2339874766 | -92.9360395857  |
| 614.0000000000 | 30672.8462568937 | -102.3789995705 |
| 616.0000000000 | 30307.0619086001 | -111.2642184866 |
| 618.0000000000 | 29958.9158959241 | -118.7328908122 |
| 620.0000000000 | 29626.6681859152 | -124.1681493093 |
| 622.0000000000 | 29308.8177664683 | -127.1986787820 |
| 624.0000000000 | 29004.0995566589 | -127.6854156743 |
| 626.0000000000 | 28711.4681841684 | -125.6947481624 |
| 628.0000000000 | 28430.0724424535 | -121.4620502868 |
| 630.0000000000 | 28159.2239206933 | -115.3494704417 |
| 632.0000000000 | 27898.3628609082 | -107.8016995137 |
| 634.0000000000 | 27647.0237858892 | -99.3030258625  |
| 636.0000000000 | 27404.8029008178 | -90.3384045201  |
| 638.0000000000 | 27171.3287365164 | -81.3605869667  |
| 640.0000000000 | 26946.2370016957 | -72.7646333472  |
| 642.0000000000 | 26729.1501664220 | -64.8704145221  |
| 644.0000000000 | 26519.6619229846 | -57.9130546246  |
| 646.0000000000 | 26317.3263703689 | -52.0407057104  |
| 648.0000000000 | 26121.6515457340 | -47.3186144243  |
| 650.0000000000 | 25932.0967769669 | -43.7381539394  |

|                |                  |                 |
|----------------|------------------|-----------------|
| 652.0000000000 | 25748.0732472301 | -41.2293568015  |
| 654.0000000000 | 25568.9471356334 | -39.6754862443  |
| 656.0000000000 | 25394.0447165510 | -38.9283035676  |
| 658.0000000000 | 25222.6588520157 | -38.8228968312  |
| 660.0000000000 | 25054.0563857688 | -39.1911960747  |
| 662.0000000000 | 24887.4860335989 | -39.8735768593  |
| 664.0000000000 | 24722.1864536870 | -40.7282154994  |
| 666.0000000000 | 24557.3942655931 | -41.6380816996  |
| 668.0000000000 | 24392.3518619118 | -42.5156228131  |
| 670.0000000000 | 24226.3149189382 | -43.3053040510  |
| 672.0000000000 | 24058.5595600631 | -43.9842252981  |
| 674.0000000000 | 23888.3891576908 | -44.5610492711  |
| 676.0000000000 | 23715.1407771090 | -45.0734631335  |
| 678.0000000000 | 23538.1912707663 | -45.5843727652  |
| 680.0000000000 | 23356.9630262895 | -46.1770100385  |
| 682.0000000000 | 23170.9293591659 | -46.9491288659  |
| 684.0000000000 | 22979.6195242712 | -48.0064801948  |
| 686.0000000000 | 22782.6233022061 | -49.4557886585  |
| 688.0000000000 | 22579.5950992650 | -51.3974984561  |
| 690.0000000000 | 22370.2574859486 | -53.9186039708  |
| 692.0000000000 | 22154.4040898587 | -57.0859207976  |
| 694.0000000000 | 21931.9017556530 | -60.9401747411  |
| 696.0000000000 | 21702.6918879991 | -65.4912815571  |
| 698.0000000000 | 21466.7909031199 | -70.7151537855  |
| 700.0000000000 | 21224.2897300861 | -76.5523021114  |
| 702.0000000000 | 20975.3523236059 | -82.9084007349  |
| 704.0000000000 | 20720.2131745087 | -89.6568663967  |
| 706.0000000000 | 20459.1738310650 | -96.6433690396  |
| 708.0000000000 | 20192.5984722539 | -103.6920601406 |
| 710.0000000000 | 19920.9086016390 | -110.6131843542 |
| 712.0000000000 | 19644.5769562619 | -117.2116419316 |
| 714.0000000000 | 19364.1207476952 | -123.2960019358 |
| 716.0000000000 | 19080.0943711152 | -128.6874350541 |
| 718.0000000000 | 18793.0817321981 | -133.2280419276 |
| 720.0000000000 | 18503.6883503315 | -136.7880970506 |
| 722.0000000000 | 18212.5333998604 | -139.2718050004 |
| 724.0000000000 | 17920.2418489004 | -140.6212680895 |
| 726.0000000000 | 17627.4368479604 | -140.8184837968 |
| 728.0000000000 | 17334.7325087119 | -139.8853169901 |
| 730.0000000000 | 17042.7271974159 | -137.8815164769 |
| 732.0000000000 | 16751.9974485459 | -134.9009590999 |
| 734.0000000000 | 16463.0925829185 | -131.0664001665 |
| 736.0000000000 | 16176.5300920543 | -126.5230811169 |
| 738.0000000000 | 15892.7918274373 | -121.4315907870 |
| 740.0000000000 | 15612.3210106661 | -115.9603944047 |
| 742.0000000000 | 15335.5200589521 | -110.2784356208 |

|                |                  |                 |
|----------------|------------------|-----------------|
| 744.0000000000 | 15062.7492006753 | -104.5481842329 |
| 746.0000000000 | 14794.3258382882 | -98.9194500089  |
| 748.0000000000 | 14530.5246011629 | -93.5242162613  |
| 750.0000000000 | 14271.5780192526 | -88.4726711434  |
| 752.0000000000 | 14017.6777398279 | -83.8505355979  |
| 754.0000000000 | 13768.9762040309 | -79.7177096850  |
| 756.0000000000 | 13525.5886974651 | -76.1081881388  |
| 758.0000000000 | 13287.5956892828 | -73.0311350259  |
| 760.0000000000 | 13055.0453769602 | -70.4729588302  |
| 762.0000000000 | 12827.9563588133 | -68.4001946060  |
| 764.0000000000 | 12606.3203629127 | -66.7629794194  |
| 766.0000000000 | 12390.1049689957 | -65.4989006199  |
| 768.0000000000 | 12179.2562688470 | -64.5370022297  |
| 770.0000000000 | 11973.7014200102 | -63.8017510363  |
| 772.0000000000 | 11773.3510572531 | -63.2167885591  |
| 774.0000000000 | 11578.1015355905 | -62.7083254757  |
| 776.0000000000 | 11387.8369875913 | -62.2080689060  |
| 778.0000000000 | 11202.4311859208 | -61.6556078516  |
| 780.0000000000 | 11021.7492094159 | -61.0002160573  |
| 782.0000000000 | 10845.6489173201 | -60.2020629291  |
| 784.0000000000 | 10673.9822415506 | -59.2328506462  |
| 786.0000000000 | 10506.5963109882 | -58.0759183896  |
| 788.0000000000 | 10343.3344247870 | -56.7258722295  |
| 790.0000000000 | 10184.0368936506 | -55.1878115821  |
| 792.0000000000 | 10028.5417689774 | -53.4762304766  |
| 794.0000000000 | 9876.6854798619  | -51.6136746227  |
| 796.0000000000 | 9728.3033972525  | -49.6292340672  |
| 798.0000000000 | 9583.2303432524  | -47.5569467956  |
| 800.0000000000 | 9441.3010617387  | -45.4341817431  |
| 802.0000000000 | 9302.3506642976  | -43.3000610817  |
| 804.0000000000 | 9166.2150630668  | -41.1939720367  |
| 806.0000000000 | 9032.7313995478  | -39.1542084751  |
| 808.0000000000 | 8901.7384759237  | -37.2167726049  |
| 810.0000000000 | 8773.0771929716  | -35.4143577208  |
| 812.0000000000 | 8646.5909963794  | -33.7755243146  |
| 814.0000000000 | 8522.1263312255  | -32.3240742221  |
| 816.0000000000 | 8399.5331026006  | -31.0786208931  |
| 818.0000000000 | 8278.6651388749  | -30.0523483721  |
| 820.0000000000 | 8159.3806529593  | -29.2529471283  |
| 822.0000000000 | 8041.5426960759  | -28.6827114103  |
| 824.0000000000 | 7925.0195980361  | -28.3387802241  |
| 826.0000000000 | 7809.6853878028  | -28.2135022470  |
| 828.0000000000 | 7695.4201881634  | -28.2949038896  |
| 830.0000000000 | 7582.1105786290  | -28.5672392130  |
| 832.0000000000 | 7469.6499211693  | -29.0116004126  |
| 834.0000000000 | 7357.9386440508  | -29.6065680259  |

|                |                 |                |
|----------------|-----------------|----------------|
| 836.0000000000 | 7246.8844798318 | -30.3288808521 |
| 838.0000000000 | 7136.4026544416 | -31.1541067317 |
| 840.0000000000 | 7026.4160252004 | -32.0572967940 |
| 842.0000000000 | 6916.8551665778 | -33.0136074898 |
| 844.0000000000 | 6807.6584034215 | -33.9988766564 |
| 846.0000000000 | 6698.7717922825 | -34.9901419703 |
| 848.0000000000 | 6590.1490522917 | -35.9660923891 |
| 850.0000000000 | 6481.7514477969 | -36.9074455176 |
| 852.0000000000 | 6373.5476256265 | -37.7972462076 |
| 854.0000000000 | 6265.5134104032 | -38.6210840611 |
| 856.0000000000 | 6157.6315617771 | -39.3672297959 |
| 858.0000000000 | 6049.8914977874 | -40.0266925939 |
| 860.0000000000 | 5942.2889887884 | -40.5932025404 |
| 862.0000000000 | 5834.8258265041 | -41.0631240227 |
| 864.0000000000 | 5727.5094728017 | -41.4353074477 |
| 866.0000000000 | 5620.3526927136 | -41.7108878405 |
| 868.0000000000 | 5513.3731760988 | -41.8930397603 |
| 870.0000000000 | 5406.5931521271 | -41.9866985241 |
| 872.0000000000 | 5300.0390005049 | -41.9982579528 |
| 874.0000000000 | 5193.7408630540 | -41.9352547636 |
| 876.0000000000 | 5087.7322589129 | -41.8060493506 |
| 878.0000000000 | 4982.0497062640 | -41.6195120533 |
| 880.0000000000 | 4876.7323531168 | -41.3847231454 |
| 882.0000000000 | 4771.8216192966 | -41.1106937308 |
| 884.0000000000 | 4667.3608514144 | -40.8061135554 |
| 886.0000000000 | 4563.3949922354 | -40.4791304780 |
| 888.0000000000 | 4459.9702655205 | -40.1371650406 |
| 890.0000000000 | 4357.1338770998 | -39.7867622839 |
| 892.0000000000 | 4254.9337326461 | -39.4334817009 |
| 894.0000000000 | 4153.4181723584 | -39.0818250572 |
| 896.0000000000 | 4052.6357225389 | -38.7352007482 |
| 898.0000000000 | 3952.6348638517 | -38.3959224464 |
| 900.0000000000 | 3853.4638158908 | -38.0652390202 |
| 902.0000000000 | 3755.1703375542 | -37.7433920991 |
| 904.0000000000 | 3657.8015426217 | -37.4296972181 |
| 906.0000000000 | 3561.4037298621 | -37.1226441897 |
| 908.0000000000 | 3466.0222269480 | -36.8200122280 |
| 910.0000000000 | 3371.7012474349 | -36.5189953637 |
| 912.0000000000 | 3278.4837600571 | -36.2163338309 |
| 914.0000000000 | 3186.4113696052 | -35.9084473616 |
| 916.0000000000 | 3095.5242086806 | -35.5915666626 |
| 918.0000000000 | 3005.8608396585 | -35.2618597675 |
| 920.0000000000 | 2917.4581662382 | -34.9155504152 |
| 922.0000000000 | 2830.3513540147 | -34.5490261033 |
| 924.0000000000 | 2744.5737595574 | -34.1589339713 |
| 926.0000000000 | 2660.1568675425 | -33.7422631714 |



|                 |                 |                |
|-----------------|-----------------|----------------|
| 928.0000000000  | 2577.1302355396 | -33.2964128734 |
| 930.0000000000  | 2495.5214461081 | -32.8192455037 |
| 932.0000000000  | 2415.3560659084 | -32.3091252385 |
| 934.0000000000  | 2336.6576115789 | -31.7649421419 |
| 936.0000000000  | 2259.4475221687 | -31.1861226573 |
| 938.0000000000  | 2183.7451379511 | -30.5726274283 |
| 940.0000000000  | 2109.5676854692 | -29.9249376350 |
| 942.0000000000  | 2036.9302686860 | -29.2440311847 |
| 944.0000000000  | 1965.8458661258 | -28.5313502050 |
| 946.0000000000  | 1896.3253339038 | -27.7887613379 |
| 948.0000000000  | 1828.3774145394 | -27.0185103481 |
| 950.0000000000  | 1762.0087514509 | -26.2231725306 |
| 952.0000000000  | 1697.2239090189 | -25.4056003417 |
| 954.0000000000  | 1634.0253980941 | -24.5688695900 |
| 956.0000000000  | 1572.4137068136 | -23.7162254130 |
| 958.0000000000  | 1512.3873365682 | -22.8510291403 |
| 960.0000000000  | 1453.9428429482 | -21.9767070058 |
| 962.0000000000  | 1397.0748814702 | -21.0967015272 |
| 964.0000000000  | 1341.7762578703 | -20.2144262291 |
| 966.0000000000  | 1288.0379827249 | -19.3332242383 |
| 968.0000000000  | 1235.8493301412 | -18.4563311463 |
| 970.0000000000  | 1185.1979002387 | -17.5868424004 |
| 972.0000000000  | 1136.0696851255 | -16.7276853682 |
| 974.0000000000  | 1088.4491380573 | -15.8815961077 |
| 976.0000000000  | 1042.3192454516 | -15.0511007847 |
| 978.0000000000  | 997.6616014191  | -14.2385015899 |
| 980.0000000000  | 954.4564844642  | -13.4458669447 |
| 982.0000000000  | 912.6829360012  | -12.6750257249 |
| 984.0000000000  | 872.3188403278  | -11.9275651882 |
| 986.0000000000  | 833.3410056989  | -11.2048322600 |
| 988.0000000000  | 795.7252461429  | -10.5079378116 |
| 990.0000000000  | 759.4464636697  | -9.8377635538  |
| 992.0000000000  | 724.4787305260  | -9.1949711659  |
| 994.0000000000  | 690.7953711624  | -8.5800132867  |
| 996.0000000000  | 658.3690435902  | -7.9931460072  |
| 998.0000000000  | 627.1718198182  | -7.4344425205  |
| 1000.0000000000 | 597.1752650768  | -6.9038076067  |
| 1002.0000000000 | 568.3505155521  | -6.4009926563  |
| 1004.0000000000 | 540.6683543738  | -5.9256109623  |
| 1006.0000000000 | 514.0992856184  | -5.4771530398  |
| 1008.0000000000 | 488.6136061092  | -5.0550017604  |
| 1010.0000000000 | 464.1814748194  | -4.6584471199  |
| 1012.0000000000 | 440.7729797007  | -4.2867004839  |
| 1014.0000000000 | 418.3582017865  | -3.9389081844  |
| 1016.0000000000 | 396.9072764369  | -3.6141643662  |
| 1018.0000000000 | 376.3904516160  | -3.3115230070  |

|                 |                |               |
|-----------------|----------------|---------------|
| 1020.0000000000 | 356.7781431134 | -3.0300090553 |
| 1022.0000000000 | 338.0409866390 | -2.7686286515 |
| 1024.0000000000 | 320.1498867461 | -2.5263784165 |
| 1026.0000000000 | 303.0760625491 | -2.3022538046 |
| 1028.0000000000 | 286.7910902274 | -2.0952565350 |
| 1030.0000000000 | 271.2669423190 | -1.9044011249 |
| 1032.0000000000 | 256.4760238262 | -1.7287205567 |
| 1034.0000000000 | 242.3912051692 | -1.5672711221 |
| 1036.0000000000 | 228.9858520370 | -1.4191364875 |
| 1038.0000000000 | 216.2338521998 | -1.2834310341 |
| 1040.0000000000 | 204.1096393537 | -1.1593025249 |
| 1042.0000000000 | 192.5882140840 | -1.0459341551 |
| 1044.0000000000 | 181.6451620388 | -0.9425460415 |
| 1046.0000000000 | 171.2566694116 | -0.8483962085 |
| 1048.0000000000 | 161.3995358424 | -0.7627811221 |
| 1050.0000000000 | 152.0511848470 | -0.6850358286 |
| 1052.0000000000 | 143.1896718927 | -0.6145337458 |
| 1054.0000000000 | 134.7936902393 | -0.5506861565 |
| 1056.0000000000 | 126.8425746678 | -0.4929414471 |
| 1058.0000000000 | 119.3163032221 | -0.4407841361 |
| 1060.0000000000 | 112.1954970849 | -0.3937337276 |
| 1062.0000000000 | 105.4614187164 | -0.3513434275 |
| 1064.0000000000 | 99.0959683757  | -0.3131987522 |
| 1066.0000000000 | 93.0816791489  | -0.2789160601 |
| 1068.0000000000 | 87.4017106038  | -0.2481410290 |
| 1070.0000000000 | 82.0398411886  | -0.2205471036 |
| 1072.0000000000 | 76.9804594882  | -0.1958339314 |
| 1074.0000000000 | 72.2085544512  | -0.1737258039 |
| 1076.0000000000 | 67.7097046930  | -0.1539701168 |
| 1078.0000000000 | 63.4700669790  | -0.1363358623 |
| 1080.0000000000 | 59.4763639878  | -0.1206121616 |
| 1082.0000000000 | 55.7158714475  | -0.1066068465 |
| 1084.0000000000 | 52.1764047360  | -0.0941450966 |
| 1086.0000000000 | 48.8463050307  | -0.0830681348 |
| 1088.0000000000 | 45.7144250877  | -0.0732319869 |
| 1090.0000000000 | 42.7701147257  | -0.0645063052 |
| 1092.0000000000 | 40.0032060875  | -0.0567732590 |
| 1094.0000000000 | 37.4039987428  | -0.0499264902 |
| 1096.0000000000 | 34.9632446956  | -0.0438701358 |
| 1098.0000000000 | 32.6721333529  | -0.0385179142 |
| 1100.0000000000 | 30.5222765063  | -0.0337922746 |
| 1102.0000000000 | 28.5056933755  | -0.0296236079 |
| 1104.0000000000 | 26.6147957570  | -0.0259495152 |
| 1106.0000000000 | 24.8423733185  | -0.0227141332 |
| 1108.0000000000 | 23.1815790737  | -0.0198675125 |
| 1110.0000000000 | 21.6259150712  | -0.0173650468 |

|                 |               |               |
|-----------------|---------------|---------------|
| 1112.0000000000 | 20.1692183243 | -0.0151669486 |
| 1114.0000000000 | 18.8056470088 | -0.0132377714 |
| 1116.0000000000 | 17.5296669488 | -0.0115459717 |
| 1118.0000000000 | 16.3360384115 | -0.0100635113 |
| 1120.0000000000 | 15.2198032249 | -0.0087654953 |
| 1122.0000000000 | 14.1762722344 | -0.0076298434 |
| 1124.0000000000 | 13.2010131069 | -0.0066369930 |
| 1126.0000000000 | 12.2898384922 | -0.0057696295 |
| 1128.0000000000 | 11.4387945488 | -0.0050124441 |
| 1130.0000000000 | 10.6441498374 | -0.0043519146 |
| 1132.0000000000 | 9.9023845858  | -0.0037761088 |
| 1134.0000000000 | 9.2101803262  | -0.0032745077 |
| 1136.0000000000 | 8.5644099039  | -0.0028378466 |
| 1138.0000000000 | 7.9621278567  | -0.0024579732 |
| 1140.0000000000 | 7.4005611613  | -0.0021277208 |
| 1142.0000000000 | 6.8771003429  | -0.0018407942 |
| 1144.0000000000 | 6.3892909427  | -0.0015916690 |
| 1146.0000000000 | 5.9348253385  | -0.0013755012 |
| 1148.0000000000 | 5.5115349098  | -0.0011880470 |
| 1150.0000000000 | 5.1173825423  | -0.0010255913 |
| 1152.0000000000 | 4.7504554627  | -0.0008848849 |
| 1154.0000000000 | 4.4089583956  | -0.0007630879 |
| 1156.0000000000 | 4.0912070341  | -0.0006577202 |
| 1158.0000000000 | 3.7956218154  | -0.0005666177 |
| 1160.0000000000 | 3.5207219910  | -0.0004878934 |
| 1162.0000000000 | 3.2651199840  | -0.0004199030 |
| 1164.0000000000 | 3.0275160215  | -0.0003612148 |
| 1166.0000000000 | 2.8066930353  | -0.0003105833 |
| 1168.0000000000 | 2.6015118186  | -0.0002669254 |
| 1170.0000000000 | 2.4109064307  | -0.0002293001 |
| 1172.0000000000 | 2.2338798402  | -0.0001968903 |
| 1174.0000000000 | 2.0694997957  | -0.0001689869 |
| 1176.0000000000 | 1.9168949172  | -0.0001449753 |
| 1178.0000000000 | 1.7752509956  | -0.0001243226 |
| 1180.0000000000 | 1.6438074951  | -0.0001065674 |
| 1182.0000000000 | 1.5218542463  | -0.0000913104 |
| 1184.0000000000 | 1.4087283237  | -0.0000782060 |
| 1186.0000000000 | 1.3038110972  | -0.0000669556 |
| 1188.0000000000 | 1.2065254520  | -0.0000573012 |
| 1190.0000000000 | 1.1163331657  | -0.0000490201 |
| 1192.0000000000 | 1.0327324380  | -0.0000419199 |
| 1194.0000000000 | 0.9552555631  | -0.0000358348 |
| 1196.0000000000 | 0.8834667393  | -0.0000306218 |
| 1198.0000000000 | 0.8169600081  | -0.0000261578 |
